# Supplementary material for: Benchmarking of eight recurrent neural network variants for breath phase and adventitious sound detection on a self-developed open-access lung sound database—HF_Lung_V1
Source: PubMed Central journal article supplement (PMC8248710; doi:10.1371/journal.pone.0254134), 2021-07-01

# PLOS ONE

## Benchmarking of eight recurrent neural network variants for breath phase and adventitious sound detection on a self-developed open-access lung sound database—HF\_Lung\_V1 --Manuscript Draft--

|                              |                                                                                                                                                                                                                                                                                                                                                                                                                                                                                                                                                                                                                                                                                                                                                                                                                                                                                                                                                                                                                                                                                                                                                                                                                                                                                                                                                                                                                                                                                                                                                                                                                                                                                                                                                                                                                           |
|------------------------------|---------------------------------------------------------------------------------------------------------------------------------------------------------------------------------------------------------------------------------------------------------------------------------------------------------------------------------------------------------------------------------------------------------------------------------------------------------------------------------------------------------------------------------------------------------------------------------------------------------------------------------------------------------------------------------------------------------------------------------------------------------------------------------------------------------------------------------------------------------------------------------------------------------------------------------------------------------------------------------------------------------------------------------------------------------------------------------------------------------------------------------------------------------------------------------------------------------------------------------------------------------------------------------------------------------------------------------------------------------------------------------------------------------------------------------------------------------------------------------------------------------------------------------------------------------------------------------------------------------------------------------------------------------------------------------------------------------------------------------------------------------------------------------------------------------------------------|
| <b>Manuscript Number:</b>    | PONE-D-21-10240                                                                                                                                                                                                                                                                                                                                                                                                                                                                                                                                                                                                                                                                                                                                                                                                                                                                                                                                                                                                                                                                                                                                                                                                                                                                                                                                                                                                                                                                                                                                                                                                                                                                                                                                                                                                           |
| <b>Article Type:</b>         | Research Article                                                                                                                                                                                                                                                                                                                                                                                                                                                                                                                                                                                                                                                                                                                                                                                                                                                                                                                                                                                                                                                                                                                                                                                                                                                                                                                                                                                                                                                                                                                                                                                                                                                                                                                                                                                                          |
| <b>Full Title:</b>           | Benchmarking of eight recurrent neural network variants for breath phase and adventitious sound detection on a self-developed open-access lung sound database—HF_Lung_V1                                                                                                                                                                                                                                                                                                                                                                                                                                                                                                                                                                                                                                                                                                                                                                                                                                                                                                                                                                                                                                                                                                                                                                                                                                                                                                                                                                                                                                                                                                                                                                                                                                                  |
| <b>Short Title:</b>          | Automated lung sound analysis database                                                                                                                                                                                                                                                                                                                                                                                                                                                                                                                                                                                                                                                                                                                                                                                                                                                                                                                                                                                                                                                                                                                                                                                                                                                                                                                                                                                                                                                                                                                                                                                                                                                                                                                                                                                    |
| <b>Corresponding Author:</b> | Shang-Ran Huang<br>Heroic Faith Medical Science Co Ltd<br>Taipei, TAIWAN                                                                                                                                                                                                                                                                                                                                                                                                                                                                                                                                                                                                                                                                                                                                                                                                                                                                                                                                                                                                                                                                                                                                                                                                                                                                                                                                                                                                                                                                                                                                                                                                                                                                                                                                                  |
| <b>Keywords:</b>             | adventitious sound; auscultation; convolutional neural networks; lung sound; recurrent neural networks; respiratory monitor                                                                                                                                                                                                                                                                                                                                                                                                                                                                                                                                                                                                                                                                                                                                                                                                                                                                                                                                                                                                                                                                                                                                                                                                                                                                                                                                                                                                                                                                                                                                                                                                                                                                                               |
| <b>Abstract:</b>             | <p>A reliable, remote, and continuous real-time respiratory sound monitor with automated respiratory sound analysis ability is urgently required in many clinical scenarios—such as in monitoring disease progression of coronavirus disease 2019—to replace conventional auscultation with a handheld stethoscope. However, a robust computerized respiratory sound analysis algorithm has not yet been validated in practical applications. In this study, we developed a lung sound database (HF_Lung_V1) comprising 9,765 audio files of lung sounds (duration of 15 s each), 34,095 inhalation labels, 18,349 exhalation labels, 13,883 continuous adventitious sound (CAS) labels (comprising 8,457 wheeze labels, 686 stridor labels, and 4,740 rhonchi labels), and 15,606 discontinuous adventitious sound labels (all crackles). We conducted benchmark tests for long short-term memory (LSTM), gated recurrent unit (GRU), bidirectional LSTM (BiLSTM), bidirectional GRU (BiGRU), convolutional neural network (CNN)-LSTM, CNN-GRU, CNN-BiLSTM, and CNN-BiGRU models for breath phase detection and adventitious sound detection. We also conducted a performance comparison between the LSTM-based and GRU-based models, between unidirectional and bidirectional models, and between models with and without a CNN. The results revealed that these models exhibited adequate performance in lung sound analysis. The GRU-based models outperformed, in terms of F1 scores and areas under the receiver operating characteristic curves, the LSTM-based models in most of the defined tasks. Furthermore, all bidirectional models outperformed their unidirectional counterparts. Finally, the addition of a CNN improved the accuracy of lung sound analysis, especially in the CAS detection tasks.</p> |
| <b>Order of Authors:</b>     | Fu-Shun Hsu<br>Shang-Ran Huang<br>Chien-Wen Huang<br>Chao-Jung Huang<br>Yuan-Ren Cheng<br>Chun-Chieh Chen<br>Jack Hsiao<br>Chung-Wei Chen<br>Li-Chin Chen<br>Yen-Chun Lai<br>Bi-Fang Hsu<br>Nian-Jhen Lin                                                                                                                                                                                                                                                                                                                                                                                                                                                                                                                                                                                                                                                                                                                                                                                                                                                                                                                                                                                                                                                                                                                                                                                                                                                                                                                                                                                                                                                                                                                                                                                                                 |

|                                                                                                                                                                                                                                                                                                                                                                                                                                                                                                                                                                                                                                                                                                                                                                                                                                                                                                                                                                                                                                                                                                                                                                                                                                                                                                                                                                                     |                                                                                                                                                                                                                                                                                                            |
|-------------------------------------------------------------------------------------------------------------------------------------------------------------------------------------------------------------------------------------------------------------------------------------------------------------------------------------------------------------------------------------------------------------------------------------------------------------------------------------------------------------------------------------------------------------------------------------------------------------------------------------------------------------------------------------------------------------------------------------------------------------------------------------------------------------------------------------------------------------------------------------------------------------------------------------------------------------------------------------------------------------------------------------------------------------------------------------------------------------------------------------------------------------------------------------------------------------------------------------------------------------------------------------------------------------------------------------------------------------------------------------|------------------------------------------------------------------------------------------------------------------------------------------------------------------------------------------------------------------------------------------------------------------------------------------------------------|
|                                                                                                                                                                                                                                                                                                                                                                                                                                                                                                                                                                                                                                                                                                                                                                                                                                                                                                                                                                                                                                                                                                                                                                                                                                                                                                                                                                                     | Wan-Ling Tsai                                                                                                                                                                                                                                                                                              |
|                                                                                                                                                                                                                                                                                                                                                                                                                                                                                                                                                                                                                                                                                                                                                                                                                                                                                                                                                                                                                                                                                                                                                                                                                                                                                                                                                                                     | Yi-Lin Wu                                                                                                                                                                                                                                                                                                  |
|                                                                                                                                                                                                                                                                                                                                                                                                                                                                                                                                                                                                                                                                                                                                                                                                                                                                                                                                                                                                                                                                                                                                                                                                                                                                                                                                                                                     | Tzu-Ling Tseng                                                                                                                                                                                                                                                                                             |
|                                                                                                                                                                                                                                                                                                                                                                                                                                                                                                                                                                                                                                                                                                                                                                                                                                                                                                                                                                                                                                                                                                                                                                                                                                                                                                                                                                                     | Ching-Ting Tseng                                                                                                                                                                                                                                                                                           |
|                                                                                                                                                                                                                                                                                                                                                                                                                                                                                                                                                                                                                                                                                                                                                                                                                                                                                                                                                                                                                                                                                                                                                                                                                                                                                                                                                                                     | Yi-Tsun Chen                                                                                                                                                                                                                                                                                               |
|                                                                                                                                                                                                                                                                                                                                                                                                                                                                                                                                                                                                                                                                                                                                                                                                                                                                                                                                                                                                                                                                                                                                                                                                                                                                                                                                                                                     | Feipei Lai                                                                                                                                                                                                                                                                                                 |
| <b>Additional Information:</b>                                                                                                                                                                                                                                                                                                                                                                                                                                                                                                                                                                                                                                                                                                                                                                                                                                                                                                                                                                                                                                                                                                                                                                                                                                                                                                                                                      |                                                                                                                                                                                                                                                                                                            |
| <b>Question</b>                                                                                                                                                                                                                                                                                                                                                                                                                                                                                                                                                                                                                                                                                                                                                                                                                                                                                                                                                                                                                                                                                                                                                                                                                                                                                                                                                                     | <b>Response</b>                                                                                                                                                                                                                                                                                            |
| <p><b>Financial Disclosure</b></p> <p>Enter a financial disclosure statement that describes the sources of funding for the work included in this submission. Review the <a href="#">submission guidelines</a> for detailed requirements. View published research articles from <a href="#">PLOS ONE</a> for specific examples.</p> <p>This statement is required for submission and <b>will appear in the published article</b> if the submission is accepted. Please make sure it is accurate.</p> <p><b>Unfunded studies</b><br/>Enter: <i>The author(s) received no specific funding for this work.</i></p> <p><b>Funded studies</b><br/>Enter a statement with the following details:</p> <ul style="list-style-type: none"> <li>• Initials of the authors who received each award</li> <li>• Grant numbers awarded to each author</li> <li>• The full name of each funder</li> <li>• URL of each funder website</li> <li>• Did the sponsors or funders play any role in the study design, data collection and analysis, decision to publish, or preparation of the manuscript?</li> <li>• <b>NO</b> - Include this sentence at the end of your statement: <i>The funders had no role in study design, data collection and analysis, decision to publish, or preparation of the manuscript.</i></li> <li>• <b>YES</b> - Specify the role(s) played.</li> </ul> <p>* typeset</p> | <p>This study was partially funded by the Raising Children Medical Foundation, Taiwan (<a href="http://http://www.raising.org.tw">http://http://www.raising.org.tw</a>). The funders had no role in study design, data collection and analysis, decision to publish, or preparation of the manuscript.</p> |
| <p><b>Competing Interests</b></p> <p>Use the instructions below to enter a</p>                                                                                                                                                                                                                                                                                                                                                                                                                                                                                                                                                                                                                                                                                                                                                                                                                                                                                                                                                                                                                                                                                                                                                                                                                                                                                                      | <p>The authors have declared that no competing interests exist.</p>                                                                                                                                                                                                                                        |

competing interest statement for this submission. On behalf of all authors, disclose any [competing interests](#) that could be perceived to bias this work—acknowledging all financial support and any other relevant financial or non-financial competing interests.

This statement is **required** for submission and **will appear in the published article** if the submission is accepted. Please make sure it is accurate and that any funding sources listed in your Funding Information later in the submission form are also declared in your Financial Disclosure statement.

View published research articles from [PLOS ONE](#) for specific examples.

#### **NO authors have competing interests**

Enter: *The authors have declared that no competing interests exist.*

#### **Authors with competing interests**

Enter competing interest details beginning with this statement:

*I have read the journal's policy and the authors of this manuscript have the following competing interests: [insert competing interests here]*

\* typeset

#### **Ethics Statement**

Enter an ethics statement for this submission. This statement is required if the study involved:

- Human participants
- Human specimens or tissue
- Vertebrate animals or cephalopods
- Vertebrate embryos or tissues
- Field research

The recordings were approved by the Research Ethics Review Committee of Far Eastern Memorial Hospital (case number: 107052-F). Written informed consent was obtained from the 18 patients. This study was conducted in accordance with the 1964 Helsinki Declaration and its later amendments or comparable ethical standards.

Write "N/A" if the submission does not require an ethics statement.

General guidance is provided below.

Consult the [submission guidelines](#) for detailed instructions. **Make sure that all information entered here is included in the Methods section of the manuscript.**

#### Format for specific study types

##### **Human Subject Research (involving human participants and/or tissue)**

- Give the name of the institutional review board or ethics committee that approved the study
- Include the approval number and/or a statement indicating approval of this research
- Indicate the form of consent obtained (written/oral) or the reason that consent was not obtained (e.g. the data were analyzed anonymously)

##### **Animal Research (involving vertebrate animals, embryos or tissues)**

- Provide the name of the Institutional Animal Care and Use Committee (IACUC) or other relevant ethics board that reviewed the study protocol, and indicate whether they approved this research or granted a formal waiver of ethical approval
- Include an approval number if one was obtained
- If the study involved *non-human primates*, add *additional details* about animal welfare and steps taken to ameliorate suffering
- If anesthesia, euthanasia, or any kind of animal sacrifice is part of the study, include briefly which substances and/or methods were applied

##### **Field Research**

Include the following details if this study involves the collection of plant, animal, or other materials from a natural setting:

- Field permit number
- Name of the institution or relevant body that granted permission

|                                                                                                                                                                                                                                                                                                                                                                                                                                                                                                                                                                                                                                                                                                                                                                                                                                                                                                                                                                                    |                                                                                          |
|------------------------------------------------------------------------------------------------------------------------------------------------------------------------------------------------------------------------------------------------------------------------------------------------------------------------------------------------------------------------------------------------------------------------------------------------------------------------------------------------------------------------------------------------------------------------------------------------------------------------------------------------------------------------------------------------------------------------------------------------------------------------------------------------------------------------------------------------------------------------------------------------------------------------------------------------------------------------------------|------------------------------------------------------------------------------------------|
| <p><b>Data Availability</b></p> <p>Authors are required to make all data underlying the findings described fully available, without restriction, and from the time of publication. PLOS allows rare exceptions to address legal and ethical concerns. See the <a href="#">PLOS Data Policy</a> and <a href="#">FAQ</a> for detailed information.</p> <p>A Data Availability Statement describing where the data can be found is required at submission. Your answers to this question constitute the Data Availability Statement and <b>will be published in the article</b>, if accepted.</p> <p><b>Important:</b> Stating 'data available on request from the author' is not sufficient. If your data are only available upon request, select 'No' for the first question and explain your exceptional situation in the text box.</p> <p>Do the authors confirm that all data underlying the findings described in their manuscript are fully available without restriction?</p> | <p>Yes - all data are fully available without restriction</p>                            |
| <p><b>Describe where the data may be found in full sentences. If you are copying our sample text, replace any instances of XXX with the appropriate details.</b></p> <ul style="list-style-type: none"> <li>• If the data are <b>held or will be held in a public repository</b>, include URLs, accession numbers or DOIs. If this information will only be available after acceptance, indicate this by ticking the box below. For example: <i>All XXX files are available from the XXX database (accession number(s) XXX, XXX).</i></li> <li>• If the data are all contained <b>within the manuscript and/or Supporting Information files</b>, enter the following: <i>All relevant data are within the manuscript and its Supporting Information files.</i></li> <li>• If neither of these applies but you are able to provide <b>details of access elsewhere</b>, with or without limitations, please do so. For example:</li> </ul>                                           | <p>All relevant data are within the manuscript and its Supporting Information files.</p> |

*Data cannot be shared publicly because of [XXX]. Data are available from the XXX Institutional Data Access / Ethics Committee (contact via XXX) for researchers who meet the criteria for access to confidential data.*

*The data underlying the results presented in the study are available from (include the name of the third party and contact information or URL).*

- This text is appropriate if the data are owned by a third party and authors do not have permission to share the data.

\* typeset

Additional data availability information:

1 **Benchmarking of eight recurrent neural network variants for breath phase and**  
2 **adventitious sound detection on a self-developed open-access lung sound**  
3 **database—HF\_Lung\_V1**

4 Fu-Shun Hsu<sup>1,2,3</sup>, Shang-Ran Huang<sup>3</sup>, Chien-Wen Huang<sup>4</sup>, Chao-Jung Huang<sup>3</sup>, Yuan-Ren Cheng<sup>3,5,6</sup>,  
5 Chun-Chieh Chen<sup>4</sup>, Jack Hsiao<sup>7</sup>, Chung-Wei Chen<sup>2</sup>, Li-Chin Chen<sup>8</sup>, Yen-Chun Lai<sup>3</sup>, Bi-Fang Hsu<sup>3</sup>,  
6 Nian-Jhen Lin<sup>3,9</sup>, Wan-Ling Tsai<sup>3</sup>, Yi-Lin Wu<sup>3</sup>, Tzu-Ling Tseng<sup>3</sup>, Ching-Ting Tseng<sup>3</sup>, Yi-Tsun Chen<sup>3</sup>,  
7 Feipei Lai<sup>1,\*</sup>

8  
9 <sup>1</sup> Graduate Institute of Biomedical Electronics and Bioinformatics, National Taiwan University, Taipei,  
10 Taiwan

11 <sup>2</sup> Department of Critical Care Medicine, Far Eastern Memorial Hospital, New Taipei, Taiwan

12 <sup>3</sup> Heroic Faith Medical Science Co., Ltd., Taipei, Taiwan

13 <sup>4</sup> Avalanche Computing Inc., Taipei, Taiwan

14 <sup>5</sup> Department of Life Science, College of Life Science, National Taiwan University, Taipei, Taiwan

15 <sup>6</sup> Institute of Biomedical Sciences, Academia Sinica, Taipei, Taiwan

16 <sup>7</sup> HCC Healthcare Group, New Taipei, Taiwan

17 <sup>8</sup> Research Center for Information Technology Innovation, Academia Sinica, Taipei, Taiwan

18 <sup>9</sup> Division of Pulmonary Medicine, Far Eastern Memorial Hospital, New Taipei, Taiwan

19

20 Short Title: Automated lung sound analysis database

21

22 \*Corresponding Author

23 E-mail: flai@csie.ntu.edu.tw

24



25 **ABSTRACT**

26 A reliable, remote, and continuous real-time respiratory sound monitor with automated respiratory  
27 sound analysis ability is urgently required in many clinical scenarios—such as in monitoring disease  
28 progression of coronavirus disease 2019—to replace conventional auscultation with a handheld  
29 stethoscope. However, a robust computerized respiratory sound analysis algorithm has not yet been  
30 validated in practical applications. In this study, we developed a lung sound database (HF\_Lung\_V1)  
31 comprising 9,765 audio files of lung sounds (duration of 15 s each), 34,095 inhalation labels, 18,349  
32 exhalation labels, 13,883 continuous adventitious sound (CAS) labels (comprising 8,457 wheeze  
33 labels, 686 stridor labels, and 4,740 rhonchi labels), and 15,606 discontinuous adventitious sound  
34 labels (all crackles). We conducted benchmark tests for long short-term memory (LSTM), gated  
35 recurrent unit (GRU), bidirectional LSTM (BiLSTM), bidirectional GRU (BiGRU), convolutional  
36 neural network (CNN)-LSTM, CNN-GRU, CNN-BiLSTM, and CNN-BiGRU models for breath  
37 phase detection and adventitious sound detection. We also conducted a performance comparison  
38 between the LSTM-based and GRU-based models, between unidirectional and bidirectional models,  
39 and between models with and without a CNN. The results revealed that these models exhibited  
40 adequate performance in lung sound analysis. The GRU-based models outperformed, in terms of *F1*  
41 scores and areas under the receiver operating characteristic curves, the LSTM-based models in most of  
42 the defined tasks. Furthermore, all bidirectional models outperformed their unidirectional counterparts.  
43 Finally, the addition of a CNN improved the accuracy of lung sound analysis, especially in the CAS

44 detection tasks.

45

46 *Keywords:* adventitious sound, auscultation, convolutional neural networks, lung sound, recurrent

47 neural networks, respiratory monitor

## 48 **1. Introduction**

49 Respiration is vital for the normal functioning of the human body. Therefore, clinical physicians  
50 are frequently required to examine respiratory conditions. Respiratory auscultation [1-3] using a  
51 stethoscope has long been a crucial first-line physical examination. The chestpiece of a stethoscope  
52 is usually placed on a patient's chest or back for lung sound auscultation or over the patient's  
53 tracheal region for tracheal sound auscultation. During auscultation, breath cycles can be inferred,  
54 which help clinical physicians evaluate the patient's respiratory rate. In addition, pulmonary  
55 pathologies are suspected when the frequency or intensity of respiratory sounds changes or when  
56 adventitious sounds, including continuous adventitious sounds (CASs) and discontinuous  
57 adventitious sounds (DASs), are identified [1, 2, 4]. Patients with coronavirus disease 2019 exhibit  
58 adventitious sounds [5]; hence, auscultation may be a useful approach for disease diagnosis [6] and  
59 disease progression tracking. However, auscultation performed using a conventional handheld  
60 stethoscope involves some limitations [7]. First, the interpretation of auscultation results  
61 substantially depends on the subjectivity of the practitioners. Even experienced clinicians might not  
62 have high consensus rates in their interpretations of auscultatory manifestations [8, 9]. Second,  
63 auscultation is a qualitative analysis method. Comparing auscultation results between individuals and  
64 quantifying the sound change by reviewing historical records are difficult tasks. Third, prolonged  
65 continuous monitoring of respiratory sound is almost impractical.

66 To overcome the aforementioned limitations, computerized methods for respiratory sound  
67 recording and analyses based on traditional signal processing and machine learning have been  
68 proposed and reviewed [4, 10-13]. With the advent of the deep learning era, studies have developed  
69 novel deep learning-based methods for respiratory sound analysis. However, many of such studies  
70 have focused on only distinguishing healthy participants from participants with respiratory disorders  
71 [14-18] and distinguishing various types of normal breathing sounds from adventitious sounds  
72 [19-25]. Only a few studies [26-29] have explored the use of deep learning for detecting breath  
73 phases and adventitious sounds. Moreover, most previous studies on computerized lung sound  
74 analysis have been limited by insufficient data. As of writing this paper, the largest reported  
75 respiratory sound database is ICBHI 2017 Challenge [30], which comprises 6,898 breath cycles and  
76 10,775 events of wheezes and crackles acquired from 126 individuals.

77 Data size plays a major role in the creation of a robust and accurate deep learning-based respiratory  
78 sound analysis algorithm [31, 32]. Accordingly, the first aim of the present study was to establish a  
79 large and open-access respiratory sound database for training such algorithms for the detection of  
80 breath phase and adventitious sounds, mainly focusing on lung sounds. The second aim was to conduct  
81 a benchmark test on the established lung sound database by using eight recurrent neural network  
82 (RNN)-based models. RNNs [33] are effective for time-series analysis; long short-term memory  
83 (LSTM) [34] and gated recurrent unit (GRU) [35] networks, which are two RNN variants, exhibit  
84 superior performance to the original RNN model. However, whether LSTM models are superior to

85 GRU models (and vice versa) in many applications, particularly in respiratory sound analysis, is  
86 inconclusive. Bidirectional RNN models [36, 37] can transfer not only past information to the future  
87 but also future information to the past; these models consistently exhibit superior performance to  
88 unidirectional RNN models in many applications [38-40] as well as in breath phase and crackle  
89 detection [29]. However, whether bidirectional RNN models outperform unidirectional RNN models in  
90 CAS detection has yet to be determined. Furthermore, the convolutional neural network (CNN)–RNN  
91 structure has been proven to be suitable for heart sound analysis [41], lung sound analysis [19], and  
92 other tasks [39, 42]. Nevertheless, the application of the CNN–RNN structure in respiratory sound  
93 detection has yet to be fully investigated. Benchmarking can enable demonstrating the reliability and  
94 goodness of a database; it can also be applied to investigate the performance of the RNN variants in  
95 respiratory analysis.

96 In summary, the aims of this study are outlined as follows:

- 97 ■ Establish the largest open-access lung sound database as of writing this paper—HF\_Lung\_V1  
98 ([https://gitlab.com/techsupportHF/HF\\_Lung\\_V1](https://gitlab.com/techsupportHF/HF_Lung_V1)).
- 99 ■ Conduct a performance comparison between LSTM and GRU models, between unidirectional and  
100 bidirectional models, and between models with and without a CNN in breath phase and  
101 adventitious sound detection based on lung sound data.
- 102 ■ Discuss factors influencing model performance.

103

104 **2 Establishment of the lung sound database**

105 *2.1 Data sources and patients*

106 The lung sound database was established using two sources. The first source was a database  
107 used in a datathon in Taiwan Smart Emergency and Critical Care (TSECC), 2020, under the license  
108 of Creative Commons Attribution 4.0 (CC BY 4.0), provided by the Taiwan Society of Emergency  
109 and Critical Care Medicine. Lung sound recordings in the TSECC database were acquired from 261  
110 patients.

111 The second source was sound recordings acquired from 18 residents of a respiratory care ward  
112 (RCW) or a respiratory care center (RCC) in Northern Taiwan between August 2018 and October  
113 2019. The recordings were approved by the Research Ethics Review Committee of Far Eastern  
114 Memorial Hospital (case number: 107052-F). Written informed consent was obtained from the 18  
115 patients. This study was conducted in accordance with the 1964 Helsinki Declaration and its later  
116 amendments or comparable ethical standards.

117 All patients were Taiwanese and aged older than 20 years. Descriptive statistics regarding the  
118 patients' demographic data, major diagnosis, and comorbidities are presented in Table 1; however,  
119 information on the patients in the TSECC database is missing. Moreover, all 18 RCW/RCC residents  
120 were under mechanical ventilation.

121

122 **Table 1. Demographic data of patients.**

|                          | Subjects from<br>RCW/RCC | Subjects in<br>TSECC Database |
|--------------------------|--------------------------|-------------------------------|
| Number (n)               | 18                       | 261                           |
| Gender (M/F)             | 11/7                     | NA                            |
| Age                      | 67.5 (36.7, 98.3)        | NA                            |
| Height (cm)              | 163.6 (147.2, 180.0)     | NA                            |
| Weight (kg)              | 62.1 (38.2, 86.1)        | NA                            |
| BMI (kg/m <sup>2</sup> ) | 23.1 (15.6, 30.7)        | NA                            |
| Respiratory Diseases     |                          |                               |
| ARF                      | 4 (22.2%)                | NA                            |
| CRF                      | 8 (44.4%)                | NA                            |
| COPD AE                  | 1 (5.6%)                 | NA                            |
| COPD                     | 2 (11.1%)                | NA                            |
| Pneumonia                | 4 (22.2%)                | NA                            |
| ARDS                     | 1 (5.6%)                 | NA                            |
| Emphysema                | 1 (5.6%)                 | NA                            |
| Comorbidity              |                          |                               |
| CKD                      | 1 (5.6%)                 | NA                            |
| AKI                      | 3 (16.7%)                | NA                            |
| CHF                      | 2 (11.1%)                | NA                            |
| DM                       | 7 (38.9%)                | NA                            |
| HTN                      | 6 (33.3%)                | NA                            |
| Malignancy               | 1 (5.6%)                 | NA                            |
| Arrythmia                | 1 (5.6%)                 | NA                            |
| CAD                      | 1 (5.6%)                 | NA                            |

123 RCW: respiratory care ward, RCC: respiratory care center, ARF: acute respiratory failure, CRF: chronic respiratory failure, COPD AE: chronic  
124 obstructive pulmonary disease acute exacerbation, COPD: chronic obstructive pulmonary disease, ARDS: acute respiratory distress syndrome, CKD:  
125 chronic kidney disease, AKI: acute kidney injury, CHF: chronic heart failure, DM: diabetes, HTN: hypertension, CAD: cardiovascular disease. The mean  
126 values of the age, height, weight, and BMI are presented, with the corresponding 95% CI in parentheses.

127

128

## 129 2.2 Sound recording

130 Breathing lung sounds were recorded using two devices: (1) a commercial electronic

131 stethoscope (Littmann 3200, 3M, Saint Paul, Minnesota, USA) and (2) a customized multichannel  
132 acoustic recording device (HF-Type-1) that supports the connection of eight electret microphones.  
133 The signals collected by the HF-Type-1 device were transmitted to a tablet (Surface Pro 6, Microsoft,  
134 Redmond, Washington, USA; Fig 1). Breathing lung sounds were collected at the eight locations  
135 (denoted by L1–L8) indicated in Fig 2a. The auscultation locations are described in detail in the  
136 caption of Fig 2. The two devices had a sampling rate of 4,000 Hz and a bit depth of 16 bits. The  
137 audio files were recorded in the WAVE (.wav) format.

138

139

140 **Fig 1. Customized multichannel acoustic recording device (HF-Type-1) connected to a tablet.**

141

142 **Fig 2. Auscultation locations and lung sound recording protocol.** (a) Auscultation locations (L1–  
143 L8): L1: second intercostal space (ICS) on the right midclavicular line (MCL); L2: fifth ICS on the  
144 right MCL; L3: fourth ICS on the right midaxillary line (MAL); L4: tenth ICS on the right MAL; L5:  
145 second ICS on the left MCL; L6: fifth ICS on the left MCL; L7: fourth ICS on the left MAL; and L8:  
146 tenth ICS on the left MAL. (b) A standard round of breathing lung sound recording with Littmann  
147 3200 and HF-Type-1 devices. The white arrows represent a continuous recording, and the small red  
148 blocks represent 15-s recordings. When the Littmann 3200 device was used, 15.8-s signals were  
149 recorded sequentially from L1 to L8. Subsequently, all recordings were truncated to 15 s. When the  
150 HF-Type-1 device was used, sounds at L1, L2, L4, L5, L6, and L8 were recorded simultaneously.  
151 Subsequently, each 2-min signal was truncated to generate new 15-s audio files.

152

153 All lung sounds in the TSECC database were collected using the Littmann 3200 device only,  
154 where 15.8-s recordings were obtained sequentially from L1 to L8 (Fig 2b; Littmann 3200). One



155 round of recording with the Littmann 3200 device entails a recording of lung sounds from L1 to L8.

156 The TSECC database was composed of data obtained from one to three rounds of recording with the

157 Littmann 3200 device for each patient.

158 We recorded the lung sounds of the 18 RCW/RCC residents by using both the Littmann 3200

159 device and the HF-Type-1 device. The Littmann 3200 recording protocol was in accordance with that

160 used in the TSECC database, except that data from four to five rounds of lung sound recording were

161 collected instead. The HF-Type-1 device was used to record breath sounds at L1, L2, L4, L5, L6, and

162 L8. One round of recording with the HF-Type-1 device entails a synchronous and continuous

163 recording of breath sounds for 30 min (Fig 2b; HF-Type-1). However, the recording with the

164 HF-Type-1 device was occasionally interrupted; in this case, the recording duration was <30 min.

165 Voluntary deep breathing was not mandated during the recording of lung sounds. The statistics

166 of the recordings are listed in Table 2.

167

168 **Table 2. Statistics of recordings and labels of HF\_Lung\_V1 database.**

|                         | Littmann 3200 | HF-Type-1 | Total   |
|-------------------------|---------------|-----------|---------|
| Subjects                |               |           |         |
| n                       | 261           | 18        | 261     |
| Recordings              |               |           |         |
| Filename prefix         | steth_        | trunc_    | NA      |
| Rounds of recording     | 748           | 70        | NA      |
| No of 15-sec recordings | 4504          | 5261      | 9765    |
| Total duration (min)    | 1126          | 1315.25   | 2441.25 |
| Labels                  |               |           |         |
| No of I                 | 16535         | 17560     | 34095   |

|                                 |                         |                        |                          |
|---------------------------------|-------------------------|------------------------|--------------------------|
| Total duration of I (min)       | 257.17                  | 271.02                 | 528.19                   |
| Mean duration of I (sec)        | 0.93                    | 0.93                   | 0.93                     |
| No of E                         | 9107                    | 9242                   | 18349                    |
| Total duration of E (min)       | 160.25                  | 132.60                 | 292.85                   |
| Mean duration of E (sec)        | 1.06                    | 0.86                   | 0.96                     |
| No of C/W/S/R                   | 6984/3974/152/2858      | 6899/4483/534/1882     | 13883/8457/686/4740      |
| Total duration of C/W/S/R (min) | 105.90/63.92/1.94/40.04 | 85.26/55.80/7.52/21.94 | 191.16/119.73/9.46/61.98 |
| Mean duration of C/W/S/R (sec)  | 0.91/0.97/0.76/0.84     | 0.74/0.75/0.85/0.70    | 0.83/0.85/0.83/0.78      |
| No of D                         | 7266                    | 8340                   | 15606                    |
| Total duration of D (min)       | 111.75                  | 55.80                  | 230.87                   |
| Mean duration of D (sec)        | 0.92                    | 0.87                   | 0.89                     |

169 I: inhalation, E: exhalation, W: wheeze, S: stridor, R: rhonchus, C: continuous adventitious sound, D: discontinuous adventitious sound. W, S, and R were  
170 combined to form C.

171  
172

### 173 2.3 Audio file truncation

174 In this study, the standard duration of an audio signal used for inhalation, exhalation, and  
175 adventitious sound detection was 15 s. This duration was selected because a 15-s signal contains at  
176 least three complete breath cycles, which are adequate for a clinician to reach a clinical conclusion.  
177 Furthermore, a 15-s breath sound was be used previously for verification and validation [43] .

178 Because each audio file generated by the Littmann 3200 device had a length of 15.8 s, we  
179 cropped out the final 0.8-s signal from the files (Fig 2b; Littmann 3200). Moreover, we used only the  
180 first 15 s of each 2-min signal of the audio files (Fig 2b; HF-Type-1) generated by the HF-Type-1  
181 device. Table 2 presents the number of truncated 15-s recordings and the total duration.

182

### 183 2.4 Data labeling

184 Because the data in the TSECC database contains only classification labels indicating whether a  
185 CAS or DAS exists in a recording, we attempted to label the event level of all sound recordings. Two  
186 board-certified respiratory therapists (NJL and YLW) and one board-certified nurse (WLT), with 8, 3,  
187 and 13 years of clinical experience, respectively, were recruited to label the start and end points of  
188 inhalation (I), exhalation (E), wheeze (W), stridor (S), rhonchus (R), and DAS (D) events in the  
189 recordings. They labeled the sound events by listening to the recorded breath sounds while  
190 simultaneously observing the corresponding patterns on a spectrogram by using customized labeling  
191 software [44]. The labelers were asked not to label sound events if they could not clearly identify the  
192 corresponding sound or if an incomplete event at the beginning or end of an audio file caused  
193 difficulty in identification. BFH held regular meetings to ensure that the labelers had good agreement  
194 on labeling criteria based on a few samples by judging the mean pseudo- $\kappa$  value [27]. When  
195 developing artificial intelligence (AI) detection models, we combined the W, S, and R labels to form  
196 CAS labels (C). Moreover, the D labels comprised only crackles, which were not differentiated into  
197 coarse or fine crackles. The labelers were asked to label the period containing crackles but not a  
198 single explosive sound (generally less than 25 ms) of a crackle. Each recording was annotated by  
199 only one labeler; thus, the labels did not represent perfect ground truth. However, we used the labels  
200 as ground-truth labels for model training, validation, and testing. The statistics of the labels are listed  
201 in Table 2.

202

### 203 **3. Inhalation, exhalation, CAS, and DAS detection**

#### 204 *3.1 Framework*

205 The inhalation, exhalation, CAS, and DAS detection framework developed in this study is  
206 displayed in Fig 3. The prominent advantage of the research framework is its modular design.  
207 Specifically, each unit of the framework can be tested separately, and the algorithms in different parts  
208 of the framework can be modified to achieve optimal overall performance. Moreover, the output of  
209 some blocks can be used for multiple purposes. For instance, the spectrogram generated by the  
210 preprocessing block can be used as the input of a model or for visualization in the user interface for  
211 real-time monitoring.

212

#### 213 **Fig. 3. Pipeline of detection framework.**

214

215 The framework comprises three parts: preprocessing, deep learning–based modeling, and  
216 postprocessing. The preprocessing part involves signal processing and feature engineering  
217 techniques. The deep learning–based modeling part entails the use of a well-designed neural network  
218 for obtaining a sequence of classification predictions rather than a single prediction. The  
219 postprocessing part involves merging the segment prediction results and eliminating the burst event.

220

#### 221 *3.2 Preprocessing*

222 We processed the lung sound recordings at a sampling frequency of 4 kHz. First, to eliminate  
223 the 60-Hz electrical interference and a part of the heart sound noise, we applied a high-pass filter to  
224 the recordings by setting a filter order of 10 and cut-off frequency of 80 Hz. The filtered signals were  
225 then processed using the short-time Fourier transform (STFT). In the STFT, we set a Hanning  
226 window size of 256 and hop length of 64; no additional zero-padding was applied. Thus, a 15-s  
227 sound signal could be transformed into a corresponding spectrogram with a size of  $938 \times 129$ . To  
228 obtain the spectral information regarding the lung sounds, we extracted the following features [29,  
229 45]:

- 230 ■ Spectrogram: We extracted 129-bin log-magnitude spectrograms.
- 231 ■ Mel frequency cepstral coefficients (MFCCs): We extracted 20 static coefficients, 20 delta  
232 coefficients ( $\Delta$ ), and 20 acceleration coefficients ( $\Delta^2$ ). We used 40 mel bands within a frequency  
233 range of 0–4,000 Hz. The frame width used to calculate the delta and acceleration coefficients  
234 was set to 9, which resulted in a 60-bin vector per frame.
- 235 ■ Energy summation: We computed the energy summation of four frequency bands, namely 0–  
236 250, 250–500, 500–1,000, and 0–2,000 Hz, and obtained four values per time frame.

237 After extracting the aforementioned features, we concatenated them to form a  $938 \times 193$  feature  
238 matrix. Subsequently, we conducted min–max normalization on each feature. The values of the  
239 normalized features ranged between 0 and 1.

240

### 241 3.3 Deep learning models

242 We investigated the performance of eight RNN models, namely LSTM, GRU, bidirectional  
243 LSTM (BiLSTM), bidirectional GRU (BiGRU), CNN-LSTM, CNN-GRU, CNN-BiLSTM, and  
244 CNN-BiGRU, in terms of inhalation, exhalation, and adventitious sound detection. Fig 4 illustrates  
245 the detailed model structures. The outputs of the LSTM, GRU, BiLSTM, and BiGRU models were  
246  $938 \times 1$  vectors, and those of the CNN-LSTM, CNN-GRU, CNN-BiLSTM, and CNN-BiGRU  
247 models were  $469 \times 1$  vectors. An element in these vectors was set to 1 if an inhalation, exhalation,  
248 CAS, or DAS occurred within a time segment in which the output value passed the thresholding  
249 criterion; otherwise, the element was set to 0.

250

251 **Fig. 4. Model architectures and postprocessing for inhalation, exhalation, CAS, and DAS**  
252 **segment and event detection.** (a) LSTM and GRU models; (b) BiLSTM and BiGRU models; and (c)  
253 CNN-LSTM, CNN-GRU, CNN-BiLSTM, and CNN-BiGRU models.

254

255 For a fairer comparison of the performance of the unidirectional and bidirectional models, we  
256 trained additional simplified (SIMP) BiLSTM, SIMP BiGRU, SIMP CNN-BiLSTM, and SIMP  
257 CNN-BiGRU models by adjusting the number of trainable parameters. Parameter adjustment was  
258 conducted by halving the number of cells of the LSTM and GRU layers.

259 We used Adam as the optimizer in the benchmark model, and we set the initial learning rate to  
260 0.0001 with a step decay ( $0.2\times$ ) when the validation loss did not decrease for 10 epochs. The learning

261 process stopped when no improvement occurred over 50 consecutive epochs.

262

### 263 *3.4 Postprocessing*

264 The prediction vectors obtained using the adopted models can be further processed for different  
265 purposes. For example, we can transform the prediction result from frames to time for real-time  
266 monitoring. The breathing duration of most humans lies within a certain range; we considered this  
267 fact in our study. Accordingly, when the prediction results obtained using the models indicated that  
268 two consecutive inhalation events occurred within a very small interval, we checked the continuity of  
269 these two events and decided whether to merge them, as illustrated in the bottom panel of Fig 4a. For  
270 example, when the interval between the  $j$ th and  $i$ th events was smaller than  $T$  s, we computed the  
271 difference in frequency between their energy peaks ( $|\mathbf{p}_j - \mathbf{p}_i|$ ). Subsequently, if the difference was  
272 below a given threshold  $P$ , the two events were merged into a single event. In the experiment,  $T$  was  
273 set to 0.5 s, and  $P$  was set to 25 Hz. After the merging process, we further assessed whether a burst  
274 event existed. If the duration of an event was shorter than 0.05 s, the event was deleted.

275

### 276 *3.5 Dataset arrangement and cross-validation*

277 We adopted fivefold cross-validation in the training dataset to train and validate the models.

278 Moreover, we used an independent testing dataset to test the performance of the trained models.

279 According to our preliminary experience, the acoustic patterns of the breath sounds collected from

280 one patient at different auscultation locations or between short intervals had many similarities. To  
 281 avoid potential data leakage caused by our methods of collecting and truncating the breath sound  
 282 signals, we assigned all truncated recordings collected on the same day to only one of the training,  
 283 validation, or testing datasets; this is because these recordings might have been collected from the  
 284 same patient within a short period. The statistics of the datasets are listed in Table 3. We used only  
 285 audio files containing CASs and DASs to train and test their corresponding detection models.

286

287 **Table 3. Statistics of the datasets and labels of the HF\_Lung\_V1 database.**

|                                 | Training Dataset         | Testing Dataset        | Total                    |
|---------------------------------|--------------------------|------------------------|--------------------------|
| Recordings                      |                          |                        |                          |
| No of 15-sec recordings         | 7809                     | 1956                   | 9765                     |
| Total duration (min)            | 1952.25                  | 489                    | 2441.25                  |
| Labels                          |                          |                        |                          |
| No of I                         | 27223                    | 6872                   | 34095                    |
| Total duration of I (min)       | 422.17                   | 105.97                 | 528.14                   |
| Mean duration of I (sec)        | 0.93                     | 0.93                   | 0.93                     |
|                                 |                          |                        |                          |
| No of E                         | 15601                    | 2748                   | 18349                    |
| Total duration of E (min)       | 248.05                   | 44.81                  | 292.85                   |
| Mean duration of E (sec)        | 0.95                     | 0.98                   | 0.96                     |
|                                 |                          |                        |                          |
| No of C/W/S/R                   | 11464/7027/657/3780      | 2419/1430/29/960       | 13883/8457/686/4740      |
| Total duration of C/W/S/R (min) | 160.16/100.71/9.10/50.35 | 31.01/19.02/0.36/11.63 | 191.16/119.73/9.46/61.98 |
| Mean duration of C/W/S/R (sec)  | 0.84/0.86/0.83/0.80      | 0.77/0.80/0.74/0.73    | 0.83/0.85/0.83/0.78      |
|                                 |                          |                        |                          |
| No of D                         | 13794                    | 1812                   | 15606                    |
| Total duration of D (min)       | 203.59                   | 27.29                  | 230.87                   |
| Mean duration of D (sec)        | 0.89                     | 0.90                   | 0.89                     |



288 I: inhalation, E: exhalation, W: wheeze, S: stridor, R: rhonchus, C: continuous adventitious sound, D: discontinuous adventitious sound. W, S, and R were  
289 combined to form C.

290

291

### 292 3.6 Task definition and evaluation metrics

293 [4] clearly defined classification and detection at the segment, event, and recording levels. In  
294 this study, we performed two tasks. The first task involved performing detection at the segment level.  
295 The acoustic signal of each lung sound recording was transformed into a spectrogram. The temporal  
296 resolution of the spectrogram depended on the window size and overlap ratio of the STFT. The  
297 aforementioned parameters were fixed such that each spectrogram was a matrix of size  $938 \times 129$ .  
298 Thus, each recording contained 938 time segments (time frames), and each time segment was  
299 automatically labeled (Fig 5b) according to the ground-truth event labels (Fig 5a) assigned by the  
300 labelers. The output of the prediction process was a sequential prediction matrix (Fig 5c) of size  $938$   
301  $\times 1$  in the LSTM, GRU, BiLSTM, and BiGRU models and size  $469 \times 1$  in the CNN-LSTM,  
302 CNN-GRU, CNN-BiLSTM, and CNN-BiGRU models. By comparing the sequential prediction with  
303 the ground-truth time segments, we could define true positive (TP; orange vertical bars in Fig 5d),  
304 true negative (TN; green vertical bars in Fig 5d), false positive (FP; black vertical bars in Fig 5d),  
305 and false negative (FN; yellow vertical bars in Fig 5d) time segments. Subsequently, the models'  
306 sensitivity and specificity in classifying the segments in each recording were computed.

307

308 **Fig 5. Task definition and evaluation metrics.** (a) Ground-truth event labels, (b) ground-truth time  
309 segments, (c) AI inference results, (d) segment classification, (e) event detection, and (f) legend. JI:  
310 Jaccard index.

311

312 The second task entailed event detection at the recording level. After completing the sequential  
313 prediction (Fig 5c), we assembled the time segments associated with the same label into a  
314 corresponding event (Fig 5e). We also derived the start and end times of each assembled event. The  
315 Jaccard index (JI; [27]) was used to determine whether an AI inference result correctly matched the  
316 ground-truth event. For an assembled event to be designated as a TP event (orange horizontal bars in  
317 Fig 5e), the corresponding JI value must be greater than 0.5. If the JI was between 0 and 0.5, the  
318 assembled event was designated as an FN event (yellow horizontal bars in Fig 5e), and if it was 0,  
319 the assembled event was designated as an FP event (black horizontal bars in Fig 5e). A TN event  
320 cannot be defined in the task of event detection.

321 The performance of the models was evaluated using the *FI* score, and that of segment detection  
322 was evaluated using the receiver operating characteristic (ROC) curve and area under the ROC curve  
323 (AUC). In addition, the mean absolute percentage error (MAPE) of event detection was derived. The  
324 accuracy, positive predictive value (PPV), sensitivity, specificity, and *FI* score of the models are  
325 presented in the section of Supporting information.

326

327 *3.7 Hardware and software*

328 We trained the baseline models on an Ubuntu 18.04 server that was provided by the National  
329 Center for High-Performance Computing in Taiwan [Taiwan Computing Cloud (TWCC)] and was  
330 equipped with an Intel(R) Xeon(R) Gold 6154 @3.00 GHz CPU with 90 GB RAM. To manage the  
331 intensive computation involved in RNN training, we implemented the training module by using the  
332 TensorFlow 2.10, CUDA 10, and CuDNN 7 programs to run the NVIDIA Titan V100 card on the  
333 TWCC server for GPU acceleration.

## 334 4 Results

### 335 4.1 LSTM versus GRU models

336 Table 4 presents the *FI* scores used to compare the eight LSTM- and GRU-based models. When  
 337 a CNN was not added, the GRU models outperformed the LSTM models by 0.7%–9.5% in terms of  
 338 the *FI* scores. However, the CNN-GRU and CNN-BiGRU models did not outperform the  
 339 CNN-LSTM and CNN-BiLSTM models in terms of the *FI* scores (and vice versa).

340

341 **Table 4. Comparison of *FI* scores between LSTM-based models and GRU-based models.**

| Models     | n of trainable parameters | Inhalation           |                    | Exhalation           |                    | CASs                 |                    | DASs                 |                    |
|------------|---------------------------|----------------------|--------------------|----------------------|--------------------|----------------------|--------------------|----------------------|--------------------|
|            |                           | <i>FI</i> score      |                    | <i>FI</i> score      |                    | <i>FI</i> score      |                    | <i>FI</i> score      |                    |
|            |                           | Segment<br>Detection | Event<br>Detection | Segment<br>Detection | Event<br>Detection | Segment<br>Detection | Event<br>Detection | Segment<br>Detection | Event<br>Detection |
| LSTM       | 300,609                   | 73.9%                | 76.1%              | 51.8%                | 57.0%              | 15.1%                | 12.2%              | 62.6%                | 59.1%              |
| GRU        | 227,265                   | <b>76.2%</b>         | <b>78.9%</b>       | <b>59.8%</b>         | <b>65.6%</b>       | <b>24.6%</b>         | <b>20.1%</b>       | <b>65.9%</b>         | <b>62.5%</b>       |
| BiLSTM     | 732,225                   | 78.1%                | 84.0%              | 57.3%                | 63.9%              | 19.8%                | 19.1%              | 69.6%                | 70.0%              |
| BiGRU      | 552,769                   | <b>80.3%</b>         | <b>86.2%</b>       | <b>64.1%</b>         | <b>70.9%</b>       | <b>26.9%</b>         | <b>25.6%</b>       | <b>70.3%</b>         | <b>71.4%</b>       |
| CNN-LSTM   | 3,448,513                 | 77.6%                | 81.1%              | <b>57.7%</b>         | <b>62.1%</b>       | 45.3%                | 42.5%              | <b>68.8%</b>         | 64.4%              |
| CNN-GRU    | 2,605,249                 | <b>78.4%</b>         | <b>82.0%</b>       | 57.2%                | 62.0%              | <b>51.5%</b>         | <b>49.8%</b>       | 68.0%                | <b>64.6%</b>       |
| CNN-BiLSTM | 6,959,809                 | <b>80.6%</b>         | <b>86.3%</b>       | 60.4%                | 65.6%              | 47.9%                | 46.4%              | <b>71.2%</b>         | <b>70.8%</b>       |
| CNN-BiGRU  | 5,240,513                 | <b>80.6%</b>         | 86.2%              | <b>62.2%</b>         | <b>68.5%</b>       | <b>53.3%</b>         | <b>51.6%</b>       | 70.6%                | 70.0%              |

342 The bold values indicate the higher *FI* score between the compared pairs of models.

343

344 According to the ROC curves presented in Fig 6a–d, the GRU-based models outperformed the  
 345 LSTM-based models in all compared pairs, except for one pair, in terms of DAS segment detection  
 346 (AUC of 0.891 for CNN-BiLSTM vs 0.889 for CNN-BiGRU).

347

348 **Fig. 6. ROC curves for (a) inhalation, (b) exhalation, (c) CAS, and (d) DAS segment detection.**

349 The corresponding AUC values are presented.

350 *4.2 Unidirectional versus bidirectional models*

351 As presented in Table 5, the bidirectional models outperformed their unidirectional counterparts  
 352 in all the defined tasks by 0.4%–9.8% in terms of the *FI* scores, even when the bidirectional models  
 353 had fewer trainable parameters after model adjustment.

354

355 **Table 5. Comparison of *FI* scores between the unidirectional and bidirectional models.**

| Models          | n of trainable parameters | Inhalation        |                 | Exhalation        |                 | CASs              |                 | DASs              |                 |
|-----------------|---------------------------|-------------------|-----------------|-------------------|-----------------|-------------------|-----------------|-------------------|-----------------|
|                 |                           | <i>FI</i> score   |                 | <i>FI</i> score   |                 | <i>FI</i> score   |                 | <i>FI</i> score   |                 |
|                 |                           | Segment Detection | Event Detection | Segment Detection | Event Detection | Segment Detection | Event Detection | Segment Detection | Event Detection |
| LSTM            | 300,609                   | 73.9%             | 76.1%           | 51.8%             | 57.0%           | 15.1%             | 12.2%           | 62.6%             | 59.1%           |
| SIMP BiLSTM     | 235,073                   | <b>77.8%</b>      | <b>84.1%</b>    | <b>55.8%</b>      | <b>62.4%</b>    | <b>19.8%</b>      | <b>17.9%</b>    | <b>68.8%</b>      | <b>68.9%</b>    |
| GRU             | 227,265                   | 76.2%             | 78.9%           | 59.8%             | 65.6%           | 24.6%             | 20.1%           | 65.9%             | 62.5%           |
| SIMP BiGRU      | 178,113                   | <b>80.1%</b>      | <b>86.1%</b>    | <b>63.7%</b>      | <b>70.0%</b>    | <b>25.0%</b>      | <b>22.2%</b>    | <b>70.3%</b>      | <b>71.3%</b>    |
| CNN-LSTM        | 3,448,513                 | 77.6%             | 81.1%           | 57.7%             | 62.1%           | 45.3%             | 42.5%           | 68.8%             | 64.4%           |
| SIMP CNN-BiLSTM | 3,382,977                 | <b>80.0%</b>      | <b>85.8%</b>    | <b>60.4%</b>      | <b>66.2%</b>    | <b>50.8%</b>      | <b>50.2%</b>    | <b>70.2%</b>      | <b>70.2%</b>    |
| CNN-GRU         | 2,605,249                 | 78.4%             | 82.0%           | 57.2%             | 62.0%           | 51.5%             | 49.8%           | 68.0%             | 64.6%           |
| SIMP CNN-BiGRU  | 2,556,097                 | <b>80.1%</b>      | <b>85.9%</b>    | <b>62.4%</b>      | <b>68.4%</b>    | <b>52.6%</b>      | <b>51.5%</b>    | <b>69.9%</b>      | <b>69.5%</b>    |

356 The bold values indicate the higher *FI* score between the compared pairs of models. SIMP means the number of trainable parameters  
 357 is adjusted.

358

359 *4.3 Models with CNN versus those without CNN*

360 According to Table 6, the models with a CNN outperformed those without a CNN in 26 of the

361 32 compared pairs.

362

363

364 **Table 6. Comparison of *FI* scores between models without and with a CNN.**

| Models     | n of trainable parameters | Inhalation        |                 | Exhalation        |                 | CASs              |                 | DASs              |                 |
|------------|---------------------------|-------------------|-----------------|-------------------|-----------------|-------------------|-----------------|-------------------|-----------------|
|            |                           | <i>FI</i> score   |                 | <i>FI</i> score   |                 | <i>FI</i> score   |                 | <i>FI</i> score   |                 |
|            |                           | Segment Detection | Event Detection | Segment Detection | Event Detection | Segment Detection | Event Detection | Segment Detection | Event Detection |
| LSTM       | 300,609                   | 73.9%             | 76.1%           | 51.8%             | 57.0%           | 15.10%            | 12.20%          | 62.60%            | 59.10%          |
| CNN-LSTM   | 3,448,513                 | <b>77.6%</b>      | <b>81.1%</b>    | <b>57.7%</b>      | <b>62.1%</b>    | <b>45.30%</b>     | <b>42.50%</b>   | <b>68.80%</b>     | <b>64.40%</b>   |
| BiLSTM     | 732,225                   | 76.2%             | 78.9%           | <b>59.8%</b>      | <b>65.6%</b>    | 19.80%            | 17.90%          | 68.80%            | 68.90%          |
| CNN-BiLSTM | 6,959,809                 | <b>78.4%</b>      | <b>82.0%</b>    | 57.2%             | 62.0%           | <b>50.80%</b>     | <b>50.20%</b>   | <b>70.20%</b>     | <b>70.20%</b>   |
| GRU        | 227,265                   | 78.1%             | 84.0%           | 57.3%             | 63.9%           | 24.60%            | 20.10%          | 65.90%            | 62.50%          |
| CNN-GRU    | 2,605,249                 | <b>80.6%</b>      | <b>86.3%</b>    | <b>60.4%</b>      | <b>65.6%</b>    | <b>51.50%</b>     | <b>49.80%</b>   | <b>68.00%</b>     | <b>64.60%</b>   |
| BiGRU      | 178,113                   | 80.3%             | <b>86.2%</b>    | <b>64.1%</b>      | <b>70.9%</b>    | 25.00%            | 22.20%          | <b>70.30%</b>     | <b>71.30%</b>   |
| CNN-BiGRU  | 2,556,097                 | <b>80.6%</b>      | <b>86.2%</b>    | 62.2%             | 68.5%           | <b>52.60%</b>     | <b>51.50%</b>   | 69.90%            | 69.50%          |

365 The bold values indicate the higher *FI* score between the compared pairs of models.

366

367 The models with a CNN exhibited higher AUC values than did those without a CNN (Fig 6a–d),  
368 except that BiGRU had a higher AUC value than did CNN-BiGRU in terms of inhalation detection  
369 (0.963 vs 0.961), GRU had a higher AUC value than did CNN-GRU in terms of exhalation detection  
370 (0.886 vs 0.883), and BiGRU had a higher AUC value than did CNN-BiGRU in terms of exhalation  
371 detection (0.911 vs 0.899).

372 Moreover, compared with the LSTM, GRU, BiLSTM, and BiGRU models, the CNN-LSTM,

373 CNN-GRU, CNN-BiLSTM, and CNN-BiGRU models exhibited flatter and lower MAPE curves

374 over a wide range of threshold values in all event detection tasks (Fig 7a–d).

375

376

377 **Fig 7. MAPE curves for (a) inhalation, (b) exhalation, (c) CAS, and (d) DAS event detection.**

## 378 **5 Discussion**

### 379 *5.1 Benchmark results*

380 According to the *F1* scores presented in Table 4, among models without a CNN, the GRU and  
381 BiGRU models consistently outperformed the LSTM and BiLSTM models in all defined tasks.  
382 However, the GRU-based models did not have superior *F1* scores among models with a CNN.  
383 Regarding the ROC curves and AUC values (Fig 6a–d), the GRU-based models consistently  
384 outperformed the other models in all but one task. Accordingly, we can conclude that GRU-based  
385 models perform slightly better than LSTM-based models in lung sound analysis. Previous studies  
386 have also compared LSTM- and GRU-based models [38, 46, 47]. Although a concrete conclusion  
387 cannot be drawn regarding whether LSTM-based models are superior to the GRU-based models (and  
388 vice versa), GRU-based models have been reported to outperform LSTM-based models in terms of  
389 computation time [38, 47].

390 As presented in Table 5, the bidirectional models outperformed their unidirectional counterparts  
391 in all defined tasks, a finding that is consistent with several previously obtained results [29, 36, 38,  
392 40].

393 A CNN can facilitate the extraction of useful features and enhance the prediction accuracy of  
394 RNN-based models. The benefits engendered by a CNN are particularly vital in CAS detection. For  
395 the models with a CNN, the *FI* score improvement ranged from 26.0% to 30.3% and the AUC  
396 improvement ranged from 0.067 to 0.089 in the CAS detection tasks. Accordingly, we can infer that  
397 considerable information used in CAS detection resides in the local positional arrangement of the  
398 features. Thus, a two-dimensional CNN facilitates the extraction of the associated information.  
399 Notably, CNN-induced improvements in model performance in the inhalation, exhalation, and DAS  
400 detection tasks were not as high as those observed in the CAS detection tasks. The MAPE curves  
401 (Fig 7a–d) reveal that a model with a CNN has more consistent predictions over various threshold  
402 values.

403 In our previous study [26], an attention-based encoder–decoder architecture based on ResNet  
404 and LSTM exhibited favorable performance in inhalation (*FI* score of 90.4%) and exhalation (*FI*  
405 score of 93.2%) segment detection tasks. However, the model was established on the basis of a very  
406 small dataset (489 recordings of 15-s-long lung sounds). Moreover, the model involves a  
407 complicated architecture; hence, it is impossible to implement real-time respiratory monitoring in  
408 devices with limited computing power, such as smartphones or medical-grade tablets.

409 Few studies have performed event detection at the recording level by using a comparatively  
410 simple deep learning model. [29] used the BiGRU model and one-dimensional labels (similar to  
411 those used in the present study) for breath phase and crackle detection. Their BiGRU model



412 exhibited comparable performance to our models in terms of inhalation event detection (*FI* scores,  
413 87.0% vs 86.2%) and in terms of DAS event detection (*FI* scores, 72.1% vs 71.4%). However, the  
414 performance of the BiGRU model differed considerably from that of our models in terms of  
415 exhalation detection (*FI* scores: 84.6% vs 70.9%). One of the reasons for this discrepancy is that [29]  
416 established their ground-truth labels on the basis of the gold-standard signals of a pneumotachograph.  
417 Another reason is that an exhalation label is not always available following an inhalation label in our  
418 data. Finally, we did not specifically control the sounds we recorded; for example, we did not ask  
419 patients to perform voluntary deep breathing or keep ambient noise down. The factors influencing  
420 the model performance are further discussed in the next section.

421

## 422 5.2 *Factors influencing model performance*

423 The benchmark performance of the proposed models may have been influenced by the  
424 following factors: (1) unusual breathing patterns; (2) imbalanced data; (3) low signal-to-noise ratio  
425 (SNR); (4) noisy labels, including class and attribute noise, in the database; and (5) sound  
426 overlapping.

427 Fig 8 displays most of the breath patterns present in the HF\_Lung\_V1 database. Fig 8a  
428 illustrates the general pattern of a breath cycle in the lung sounds when the ratio of inhalation to  
429 exhalation durations is approximately 2:1 and an expiratory pause is noted [3, 4]. Fig 8b presents a  
430 frequent condition under which an exhalation is not completely heard by the labelers. However,

431 because we did not ask the subjects to breath voluntarily when recording the sound, many unusual  
432 breath patterns might have been recorded, such as patterns caused by shallow breathing, fast  
433 breathing, and apnea as well as those caused by double triggering of the ventilator [48] and air  
434 trapping [49, 50]. These unusual breathing patterns might confuse the labeling and learning  
435 processes and result in poor testing results.

436

437 **Fig 8. Patterns of normal breathing lung sounds.** (a) General lung sound patterns and (b) general  
438 lung sound patterns with unidentifiable exhalations. “I” represents an identifiable inhalation event, “E”  
439 represents an identifiable exhalation event, and the black areas represent pause phases.

440

441 The developed database contains imbalanced numbers of inhalation and exhalation labels  
442 (34,095 and 18,349, respectively) because not every exhalation was heard and labeled. In addition,  
443 the proposed models may possess the capability of learning the rhythmic rise and fall of breathing  
444 signals but not the capability of learning acoustic or texture features that can distinguish an  
445 inhalation from an exhalation. This may thus explain the models’ poor performance in exhalation  
446 detection. However, these models are suitable for respiratory rate estimation and apnea detection as  
447 long as appropriate inhalation detection is achieved. Furthermore, for all labels, the summation of the  
448 event duration was smaller than that of the background signal duration (these factors had a ratio of  
449 approximately 1:2.5 to 1:7). The aforementioned phenomenon can be regarded as foreground–  
450 background class imbalance [51] and will be addressed in future studies.

451 Most of the sounds in the established database were not recorded during the patients performed  
452 deep breathing; thus, the signal quality was not maximized. However, training models with such  
453 nonoptimal data increase their adaptability to real-world scenarios. Moreover, the SNR may be  
454 reduced by noise, such as human voices; music; sounds from bedside monitors, televisions, air  
455 conditioners, fans, and radios; sounds generated by mechanical ventilators; electrical noise generated  
456 by touching or moving the parts of acoustic sensors; and friction sounds generated by the rubbing of  
457 two surfaces together (e.g., rubbing clothes with the skin). A poor SNR of audio signals can lead to  
458 difficulties in labeling and prediction tasks. The features of some noise types are considerably similar  
459 to those of adventitious sounds. The poor performance of the proposed models in CAS detection can  
460 be partly attributed to the noisy environment in which the lung sounds were recorded. In particular,  
461 the sounds generated by ventilators caused numerous FP events in the CAS detection tasks. Thus,  
462 additional effort is required to develop a superior preprocessing algorithm that can filter out  
463 influential noise or to identify a strategy to ensure that models focus on learning the correct CAS  
464 features. Furthermore, the integration of active noise-canceling technology [52] or noise suppression  
465 technology [53] into respiratory sound monitors can help reduce the noise from auscultatory signals.

466 The sound recordings in the HF\_Lung\_V1 database were labeled by only one labeler; thus,  
467 some noisy labels, including class and attribute noise, may exist in the database [54]. These noisy  
468 labels are attributable to (1) the different hearing abilities of the labeler, which can cause differences  
469 in the labeled duration; (2) the absence of clear criteria for differentiating between target and

470 confusing events; (3) individual human errors; (4) tendency to not label events located close to the  
471 beginning and end of a recording; and (5) confusion caused by unusual breath patterns and poor  
472 SNRs. However, deep learning models exhibit high robustness to noisy labels [55]. Accordingly, we  
473 are currently working toward establishing better ground-truth labels.

474 Breathing generates CASs and DASs under abnormal respiratory conditions. This means that  
475 the breathing sound, CAS, and DAS might overlap with one another during the same period. This  
476 sound overlapping, along with the data imbalance, makes the CAS and DAS detection models learn  
477 to read the rise and fall of the breathing energy and falsely identify an inhalation or exhalation as  
478 CAS or DAS, respectively. This FP detection was observed in our benchmark results. In the future,  
479 strategies must be adopted to address the problem of sound overlap.

480

## 481 **6 Conclusions**

482 We established a large open-access lung sound database, namely HF\_Lung\_V1  
483 ([https://gitlab.com/techsupportHF/HF\\_Lung\\_V1](https://gitlab.com/techsupportHF/HF_Lung_V1)), that contains 9,765 audio files of lung sounds  
484 (each with a duration of 15 s), 34,095 inhalation labels, 18,349 exhalation labels, 13,883 CAS labels  
485 (comprising 8,457 wheeze labels, 686 stridor labels, and 4,740 rhonchus labels), and 15,606 DAS  
486 labels (all of which are crackles).

487 We also investigated the performance of eight RNN-based models in terms of inhalation,  
488 exhalation, CAS detection, and DAS detection in the HF\_Lung\_V1 database. We determined that the

489 bidirectional models outperformed the unidirectional models in lung sound analysis. Furthermore,  
490 the addition of a CNN to these models further improved their performance.

491 Future studies can develop more accurate respiratory sound analysis models. First, highly  
492 accurate ground-truth labels should be established. Second, researchers should investigate the  
493 performance of RNN-based models containing state-of-the-art convolutional layers. Third, regional  
494 CNN variants can be adopted in lung sound analysis if the labels are expanded to two-dimensional  
495 bounding boxes [27]. Fourth, wavelet-based approaches, empirical mode decomposition, and other  
496 methods that can extract different features should be investigated [4, 56]. Finally, respiratory sound  
497 monitors should be equipped with the capability of tracheal breath sound analysis [52].

498

499 **Acknowledgments**

500 This study was partially funded by the Raising Children Medical Foundation, Taiwan. The authors  
501 thank the employees of Heroic Faith Medical Science Co. Ltd. who have ever partially contributed to  
502 developing the HF-Type-1 and establishing the HF\_Lung\_V1 database. This manuscript was edited  
503 by Wallace Academic Editing. We also thank the All Vista Healthcare Center, Ministry of Science  
504 and Technology, Taiwan for the support.

505

- 507 1. Bohadana A, Izbicki G, Kraman SS. Fundamentals of lung auscultation. *New England Journal*  
508 *of Medicine*. 2014;370(8):744-51.
- 509 2. Goettel N, Herrmann MJ. *Breath Sounds: From Basic Science to Clinical Practice*. *Anesthesia*  
510 *& Analgesia*. 2019;128(3):e42.
- 511 3. Sarkar M, Madabhavi I, Niranjana N, Dogra M. Auscultation of the respiratory system. *Annals*  
512 *of thoracic medicine*. 2015;10(3):158.
- 513 4. Pramono RXA, Bowyer S, Rodriguez-Villegas E. Automatic adventitious respiratory sound  
514 analysis: A systematic review. *PloS one*. 2017;12(5):e0177926.
- 515 5. Wang B, Liu Y, Wang Y, Yin W, Liu T, Liu D, et al. Characteristics of Pulmonary auscultation  
516 in patients with 2019 novel coronavirus in china. 2020.
- 517 6. Raj V, Renjini A, Swapna M, Sreejyothi S, Sankararaman S. Nonlinear time series and principal  
518 component analyses: Potential diagnostic tools for COVID-19 auscultation. *Chaos, Solitons &*  
519 *Fractals*. 2020;140:110246.
- 520 7. Sovijärvi A, Vanderschoot J, Earis J. Standardization of computerized respiratory sound  
521 analysis. *Crit Care Med*. 1997;156:974-87.
- 522 8. Berry MP, Martí J-D, Ntoumenopoulos G. Inter-rater agreement of auscultation, palpable  
523 fremitus, and ventilator waveform sawtooth patterns between clinicians. *Respiratory care*.  
524 2016;61(10):1374-83.
- 525 9. Grunnreis FO. Intra-and interobserver variation in lung sound classification. Effect of training:  
526 UiT Norges arktiske universitet; 2016.
- 527 10. Gurung A, Scrafford CG, Tielsch JM, Levine OS, Checkley W. Computerized lung sound  
528 analysis as diagnostic aid for the detection of abnormal lung sounds: a systematic review and  
529 meta-analysis. *Respiratory medicine*. 2011;105(9):1396-403.
- 530 11. Huq S, Moussavi Z. Acoustic breath-phase detection using tracheal breath sounds. *Medical &*  
531 *biological engineering & computing*. 2012;50(3):297-308.
- 532 12. Mesaros A, Heittola T, Virtanen T. Metrics for polyphonic sound event detection. *Applied*  
533 *Sciences*. 2016;6(6):162.
- 534 13. Pasterkamp H, Kraman SS, Wodicka GR. Respiratory sounds: advances beyond the  
535 stethoscope. *American journal of respiratory and critical care medicine*. 1997;156(3):974-87.
- 536 14. Chambres G, Hanna P, Desainte-Catherine M, editors. Automatic detection of patient with  
537 respiratory diseases using lung sound analysis. 2018 International Conference on Content-Based  
538 Multimedia Indexing (CBMI); 2018: IEEE.
- 539 15. Demir F, Sengur A, Bajaj V. Convolutional neural networks based efficient approach for  
540 classification of lung diseases. *Health Inf Sci Syst*. 2020;8(1):4.

- 541 16. Hosseini M, Ren H, Rashid H-A, Mazumder AN, Prakash B, Mohsenin T. Neural Networks for  
542 Pulmonary Disease Diagnosis using Auditory and Demographic Information. arXiv preprint  
543 arXiv:201113194. 2020.
- 544 17. Perna D, Tagarelli A. Deep Auscultation: Predicting Respiratory Anomalies and Diseases via  
545 Recurrent Neural Networks. 2019 IEEE 32nd International Symposium on Computer-Based  
546 Medical Systems (CBMS)2019. p. 50-5.
- 547 18. Pham L, McLoughlin I, Phan H, Tran M, Nguyen T, Palaniappan R. Robust Deep Learning  
548 Framework For Predicting Respiratory Anomalies and Diseases. arXiv preprint arXiv:200203894.  
549 2020.
- 550 19. Acharya J, Basu A. Deep Neural Network for Respiratory Sound Classification in Wearable  
551 Devices Enabled by Patient Specific Model Tuning. IEEE transactions on biomedical circuits and  
552 systems. 2020;14(3):535-44.
- 553 20. Aykanat M, Kılıç Ö, Kurt B, Saryal S. Classification of lung sounds using convolutional neural  
554 networks. EURASIP Journal on Image and Video Processing. 2017;2017(1).
- 555 21. Bardou D, Zhang K, Ahmad SM. Lung sounds classification using convolutional neural  
556 networks. Artif Intell Med. 2018;88:58-69.
- 557 22. Chen H, Yuan X, Pei Z, Li M, Li J. Triple-Classification of Respiratory Sounds Using  
558 Optimized S-Transform and Deep Residual Networks. IEEE Access. 2019;7:32845-52.
- 559 23. Grzywalski T, Piecuch M, Szajek M, Breborowicz A, Hafke-Dys H, Kocinski J, et al. Practical  
560 implementation of artificial intelligence algorithms in pulmonary auscultation examination. Eur J  
561 Pediatr. 2019;178(6):883-90.
- 562 24. Kochetov K, Putin E, Balashov M, Filchenkov A, Shalyto A. Noise Masking Recurrent Neural  
563 Network for Respiratory Sound Classification. Artificial Neural Networks and Machine Learning –  
564 ICANN 2018. Lecture Notes in Computer Science2018. p. 208-17.
- 565 25. Li L, Xu W, Hong Q, Tong F, Wu J, editors. Classification between normal and adventitious  
566 lung sounds using deep neural network. 2016 10th International Symposium on Chinese Spoken  
567 Language Processing (ISCSLP); 2016: IEEE.
- 568 26. Hsiao C-H, Lin T-W, Lin C-W, Hsu F-S, Lin FY-S, Chen C-W, et al., editors. Breathing Sound  
569 Segmentation and Detection Using Transfer Learning Techniques on an Attention-Based  
570 Encoder-Decoder Architecture. 2020 42nd Annual International Conference of the IEEE Engineering  
571 in Medicine & Biology Society (EMBC); 2020: IEEE.
- 572 27. Jácome C, Ravn J, Holsbø E, Aviles-Solis JC, Melbye H, Ailo Bongo L. Convolutional neural  
573 network for breathing phase detection in lung sounds. Sensors. 2019;19(8):1798.
- 574 28. Liu Y, Lin Y, Gao S, Zhang H, Wang Z, Gao Y, et al., editors. Respiratory sounds feature  
575 learning with deep convolutional neural networks. 2017 IEEE 15th Intl Conf on Dependable,  
576 Autonomic and Secure Computing, 15th Intl Conf on Pervasive Intelligence and Computing, 3rd Intl



577 Conf on Big Data Intelligence and Computing and Cyber Science and Technology Congress  
578 (DASC/PiCom/DataCom/CyberSciTech); 2017: IEEE.

579 29. Messner E, Fediuk M, Swatek P, Scheidl S, Smolle-Juttner F-M, Olschewski H, et al., editors.  
580 Crackle and breathing phase detection in lung sounds with deep bidirectional gated recurrent neural  
581 networks. 2018 40th Annual International Conference of the IEEE Engineering in Medicine and  
582 Biology Society (EMBC); 2018: IEEE.

583 30. Rocha B, Filos D, Mendes L, Vogiatzis I, Perantoni E, Kaimakamis E, et al., editors. A  
584 respiratory sound database for the development of automated classification. International Conference  
585 on Biomedical and Health Informatics; 2017: Springer.

586 31. Hestness J, Narang S, Ardalani N, Diamos G, Jun H, Kianinejad H, et al. Deep learning scaling  
587 is predictable, empirically. arXiv preprint arXiv:171200409. 2017.

588 32. Sun C, Shrivastava A, Singh S, Gupta A, editors. Revisiting unreasonable effectiveness of data  
589 in deep learning era. Proceedings of the IEEE international conference on computer vision; 2017.

590 33. Elman JL. Finding structure in time. *Cognitive science*. 1990;14(2):179-211.

591 34. Hochreiter S, Schmidhuber J. Long short-term memory. *Neural computation*.  
592 1997;9(8):1735-80.

593 35. Cho K, Van Merriënboer B, Gulcehre C, Bahdanau D, Bougares F, Schwenk H, et al. Learning  
594 phrase representations using RNN encoder-decoder for statistical machine translation. arXiv preprint  
595 arXiv:14061078. 2014.

596 36. Graves A, Schmidhuber J. Framewise phoneme classification with bidirectional LSTM and  
597 other neural network architectures. *Neural networks*. 2005;18(5-6):602-10.

598 37. Schuster M, Paliwal KK. Bidirectional recurrent neural networks. *IEEE transactions on Signal*  
599 *Processing*. 1997;45(11):2673-81.

600 38. Khandelwal S, Lecouteux B, Besacier L. Comparing GRU and LSTM for automatic speech  
601 recognition. 2016.

602 39. Li L, Wu Z, Xu M, Meng HM, Cai L, editors. Combining CNN and BLSTM to Extract Textual  
603 and Acoustic Features for Recognizing Stances in Mandarin Ideological Debate Competition.  
604 INTERSPEECH; 2016.

605 40. Parascandolo G, Huttunen H, Virtanen T, editors. Recurrent neural networks for polyphonic  
606 sound event detection in real life recordings. 2016 IEEE International Conference on Acoustics,  
607 Speech and Signal Processing (ICASSP); 2016: IEEE.

608 41. Deng M, Meng T, Cao J, Wang S, Zhang J, Fan H. Heart sound classification based on  
609 improved MFCC features and convolutional recurrent neural networks. *Neural Networks*. 2020.

610 42. Zhao H, Zarar S, Tashev I, Lee C-H, editors. Convolutional-recurrent neural networks for  
611 speech enhancement. 2018 IEEE International Conference on Acoustics, Speech and Signal  
612 Processing (ICASSP); 2018: IEEE.

- 613 43. Pasterkamp H, Brand PL, Everard M, Garcia-Marcos L, Melbye H, Priftis KN. Towards the  
614 standardisation of lung sound nomenclature. *European Respiratory Journal*. 2016;47(3):724-32.
- 615 44. Hsu F-S, Huang C-J, Kuo C-Y, Huang S-R, Cheng Y-R, Wang J-H, et al. Development of a  
616 respiratory sound labeling software for training a deep learning-based respiratory sound analysis  
617 model. arXiv preprint arXiv:210101352. 2021(, ).
- 618 45. Chamberlain D, Kodgule R, Ganelin D, Miglani V, Fletcher RR, editors. Application of  
619 semi-supervised deep learning to lung sound analysis. 2016 38th Annual International Conference of  
620 the IEEE Engineering in Medicine and Biology Society (EMBC); 2016: IEEE.
- 621 46. Chung J, Gulcehre C, Cho K, Bengio Y. Empirical evaluation of gated recurrent neural  
622 networks on sequence modeling. arXiv preprint arXiv:14123555. 2014.
- 623 47. Shewalkar AN. Comparison of rnn, lstm and gru on speech recognition data. 2018.
- 624 48. Thille AW, Rodriguez P, Cabello B, Lellouche F, Brochard L. Patient-ventilator asynchrony  
625 during assisted mechanical ventilation. *Intensive care medicine*. 2006;32(10):1515-22.
- 626 49. Blanch L, Bernabé F, Lucangelo U. Measurement of air trapping, intrinsic positive  
627 end-expiratory pressure, and dynamic hyperinflation in mechanically ventilated patients. *Respiratory  
628 care*. 2005;50(1):110-24.
- 629 50. Miller WT, Chatzkel J, Hewitt MG. Expiratory air trapping on thoracic computed tomography.  
630 A diagnostic subclassification. *Annals of the American Thoracic Society*. 2014;11(6):874-81.
- 631 51. Oksuz K, Cam BC, Kalkan S, Akbas E. Imbalance problems in object detection: A review.  
632 *IEEE Transactions on Pattern Analysis and Machine Intelligence*. 2020.
- 633 52. Wu Y, Liu J, He B, Zhang X, Yu L. Adaptive Filtering Improved Apnea Detection Performance  
634 Using Tracheal Sounds in Noisy Environment: A Simulation Study. *BioMed Research International*.  
635 2020;2020.
- 636 53. Emmanouilidou D, McCollum ED, Park DE, Elhilali M. Computerized lung sound screening  
637 for pediatric auscultation in noisy field environments. *IEEE Transactions on Biomedical  
638 Engineering*. 2017;65(7):1564-74.
- 639 54. Zhu X, Wu X. Class noise vs. attribute noise: A quantitative study. *Artificial intelligence  
640 review*. 2004;22(3):177-210.
- 641 55. Rolnick D, Veit A, Belongie S, Shavit N. Deep learning is robust to massive label noise. arXiv  
642 preprint arXiv:170510694. 2017.
- 643 56. Pramono RXA, Imtiaz SA, Rodriguez-Villegas E. Evaluation of features for classification of  
644 wheezes and normal respiratory sounds. *PloS one*. 2019;14(3):e0213659.

645

646

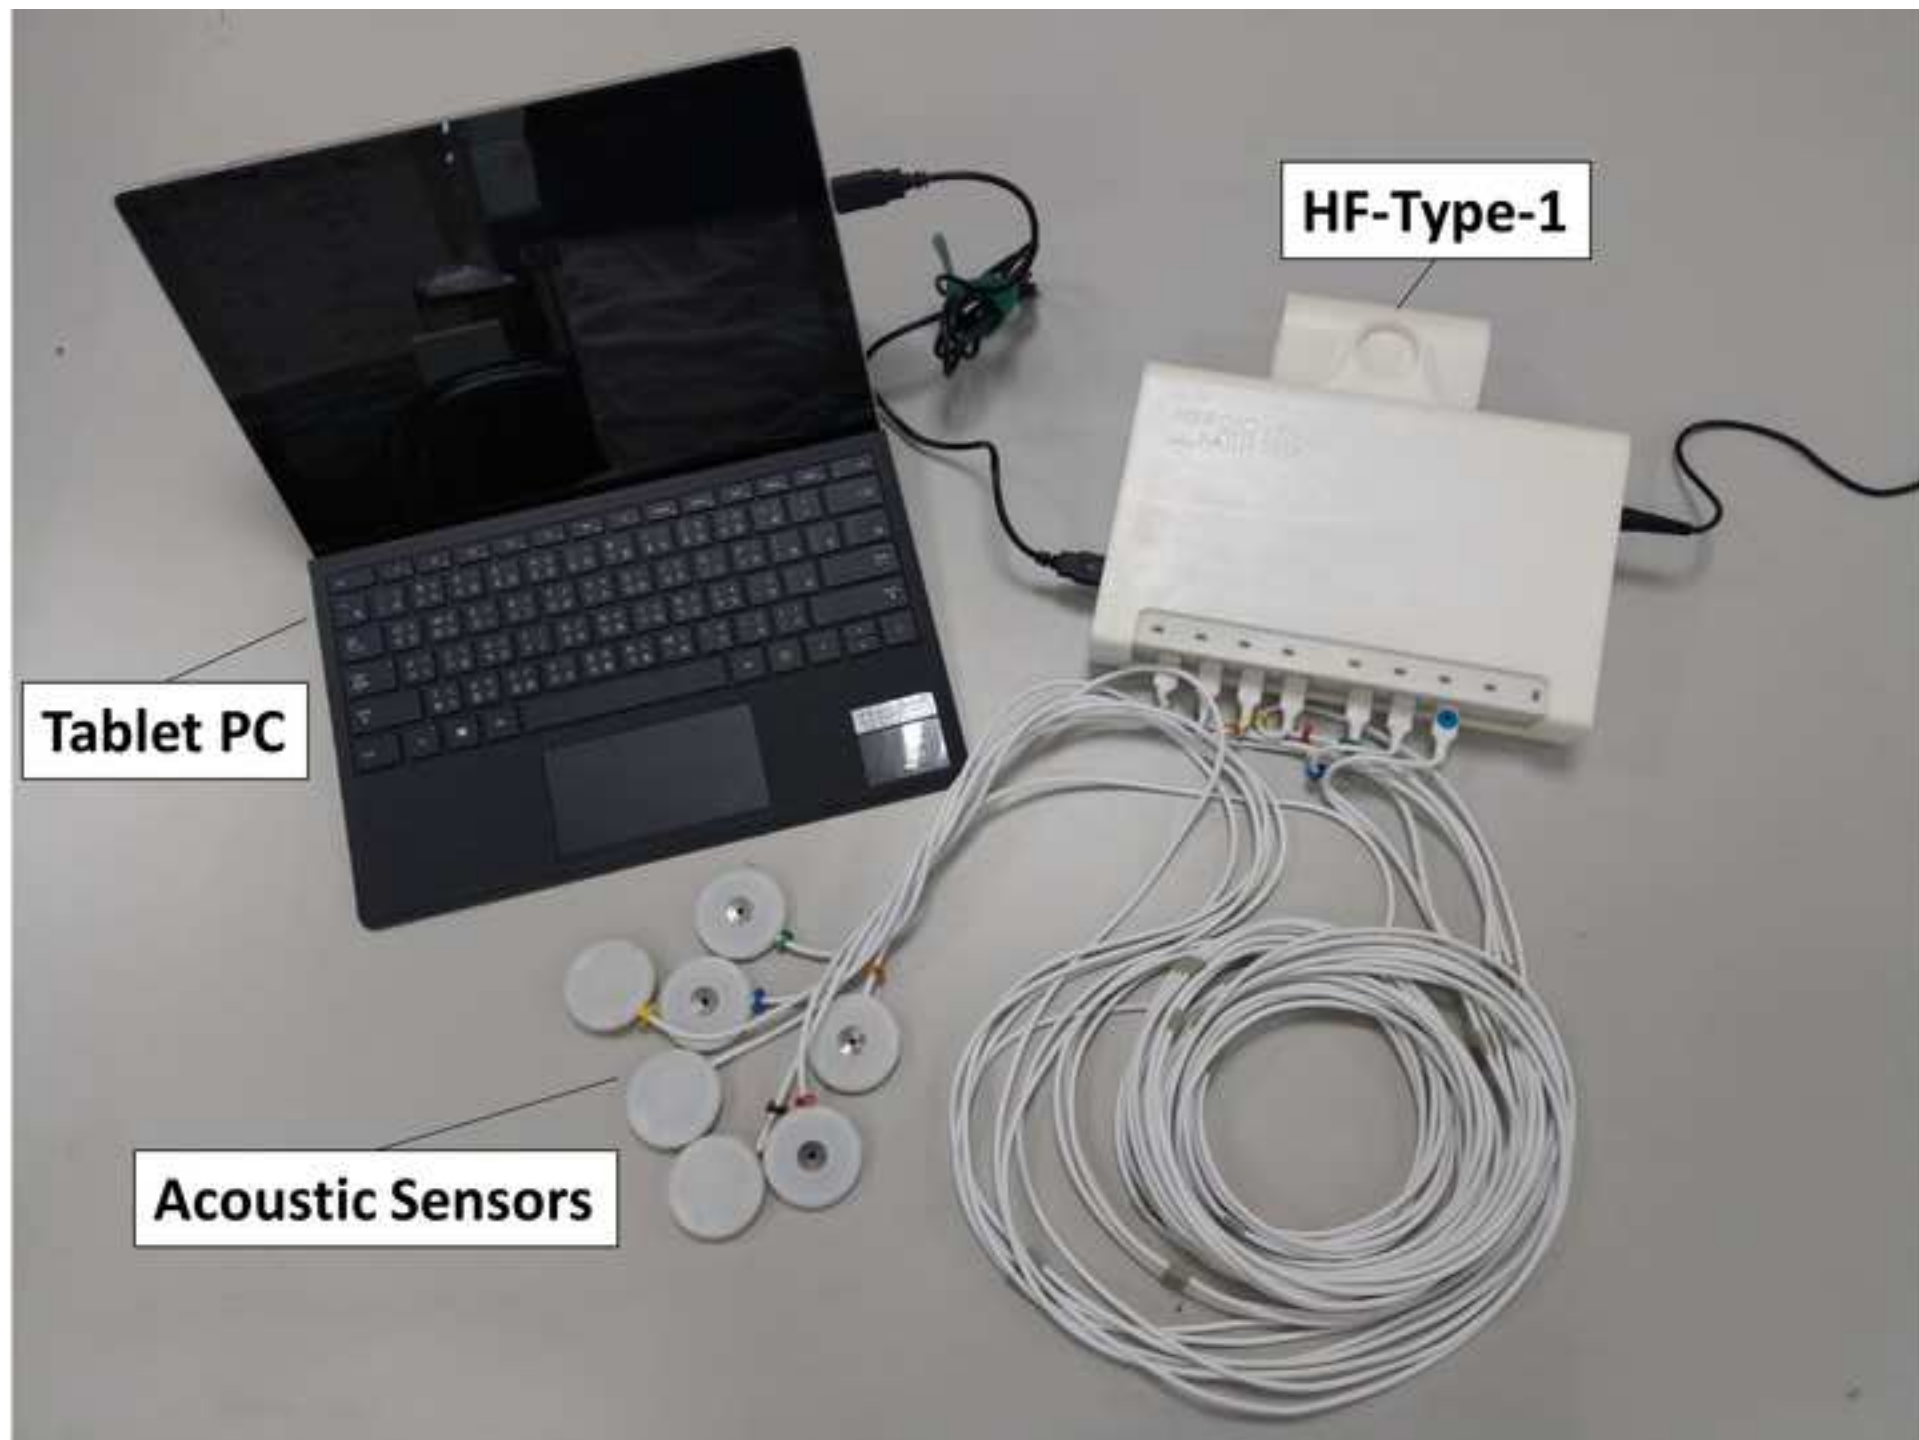

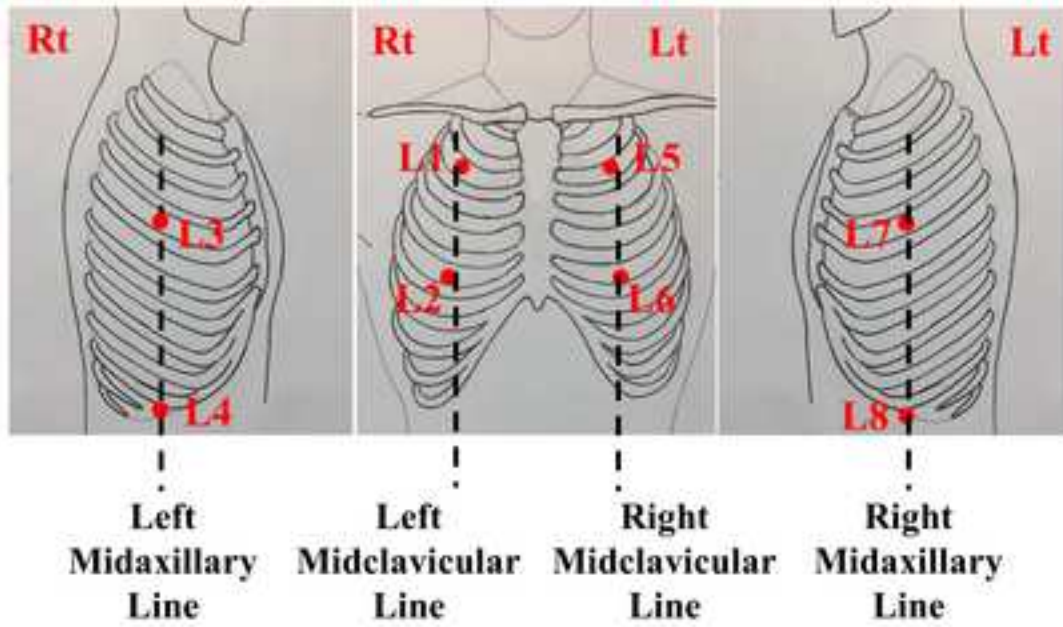

(a)

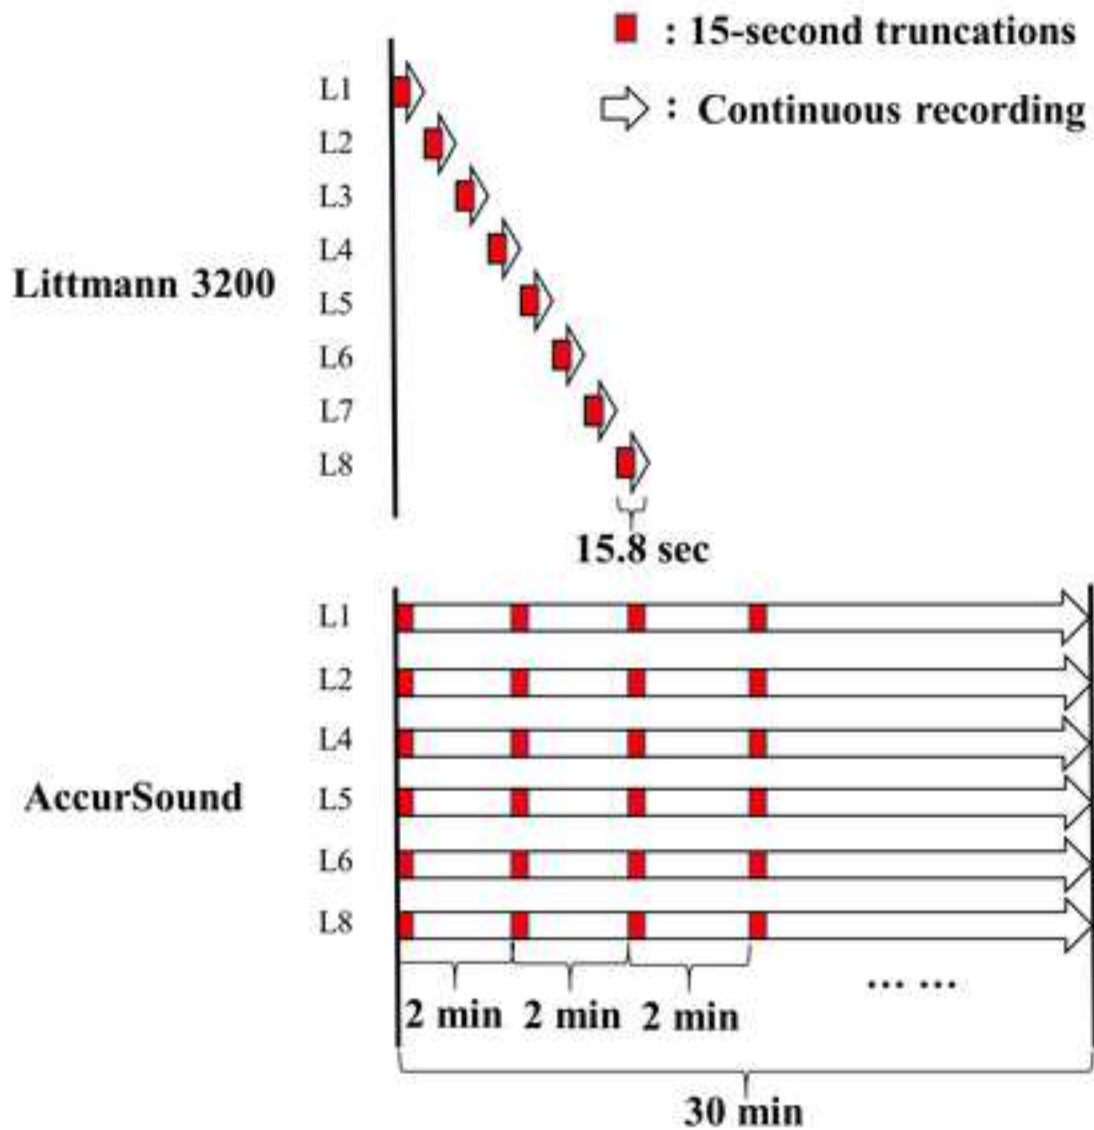

(b)

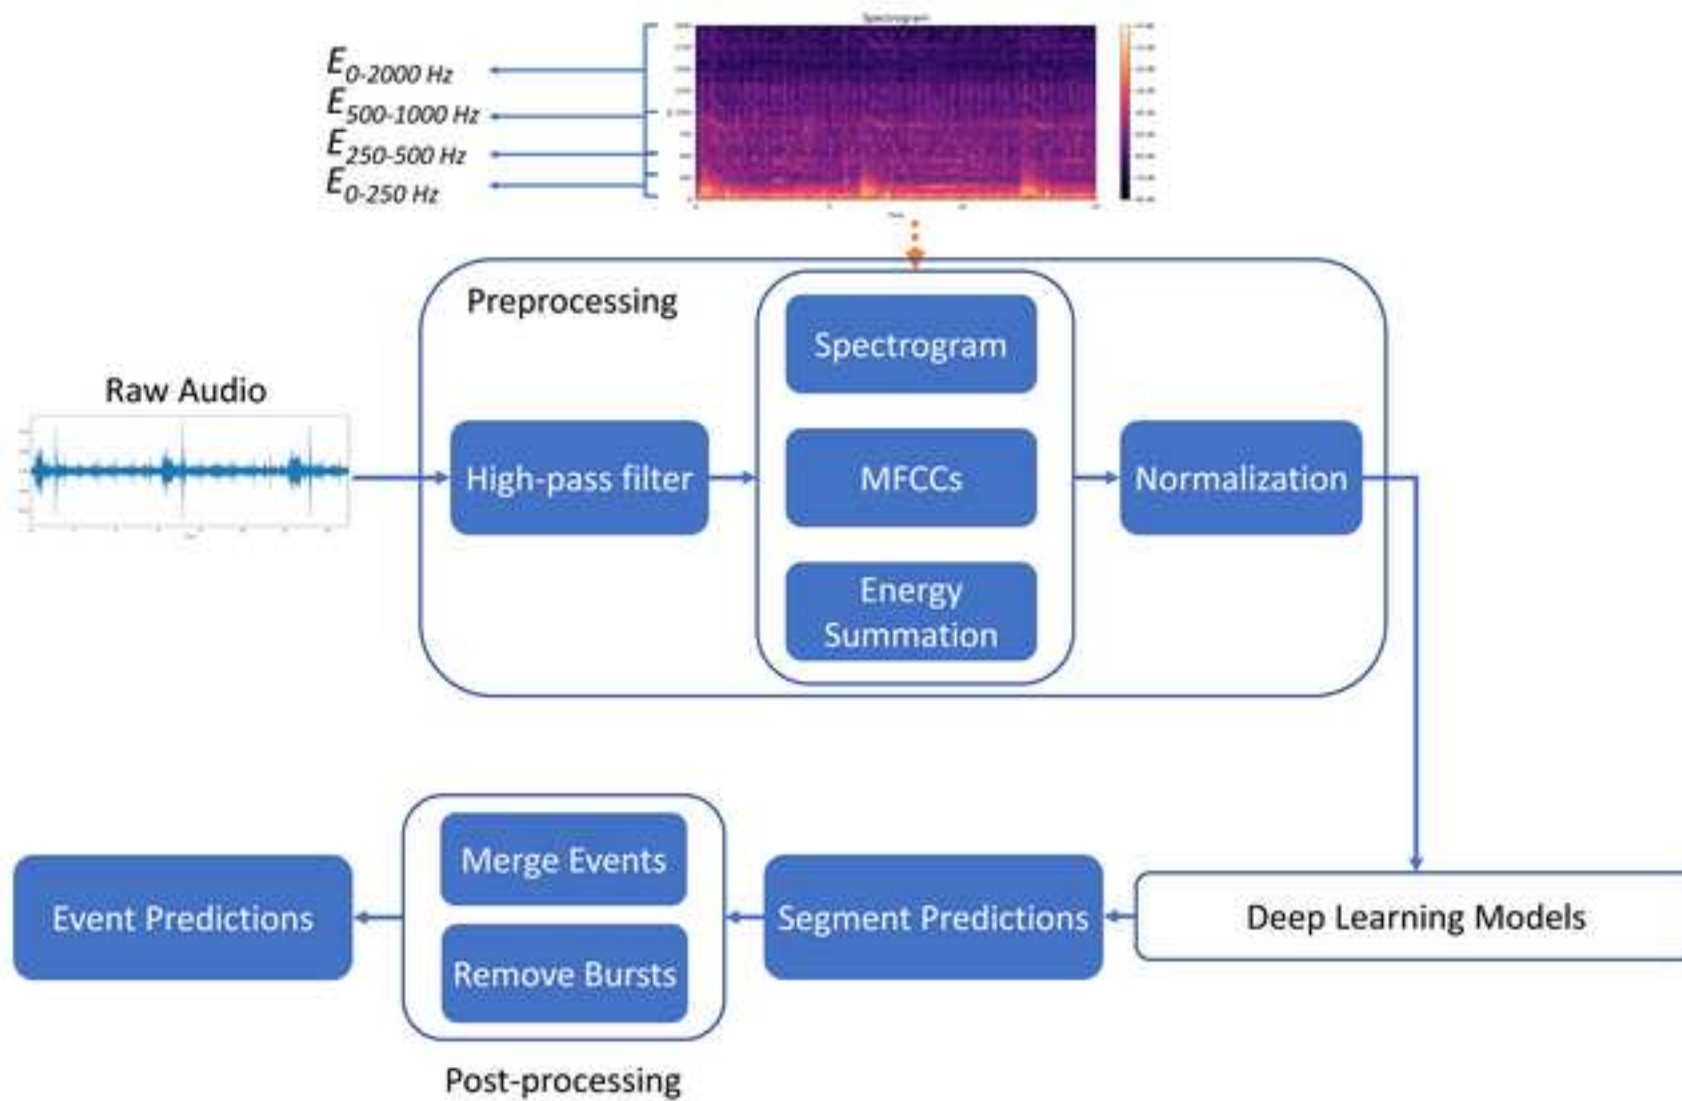

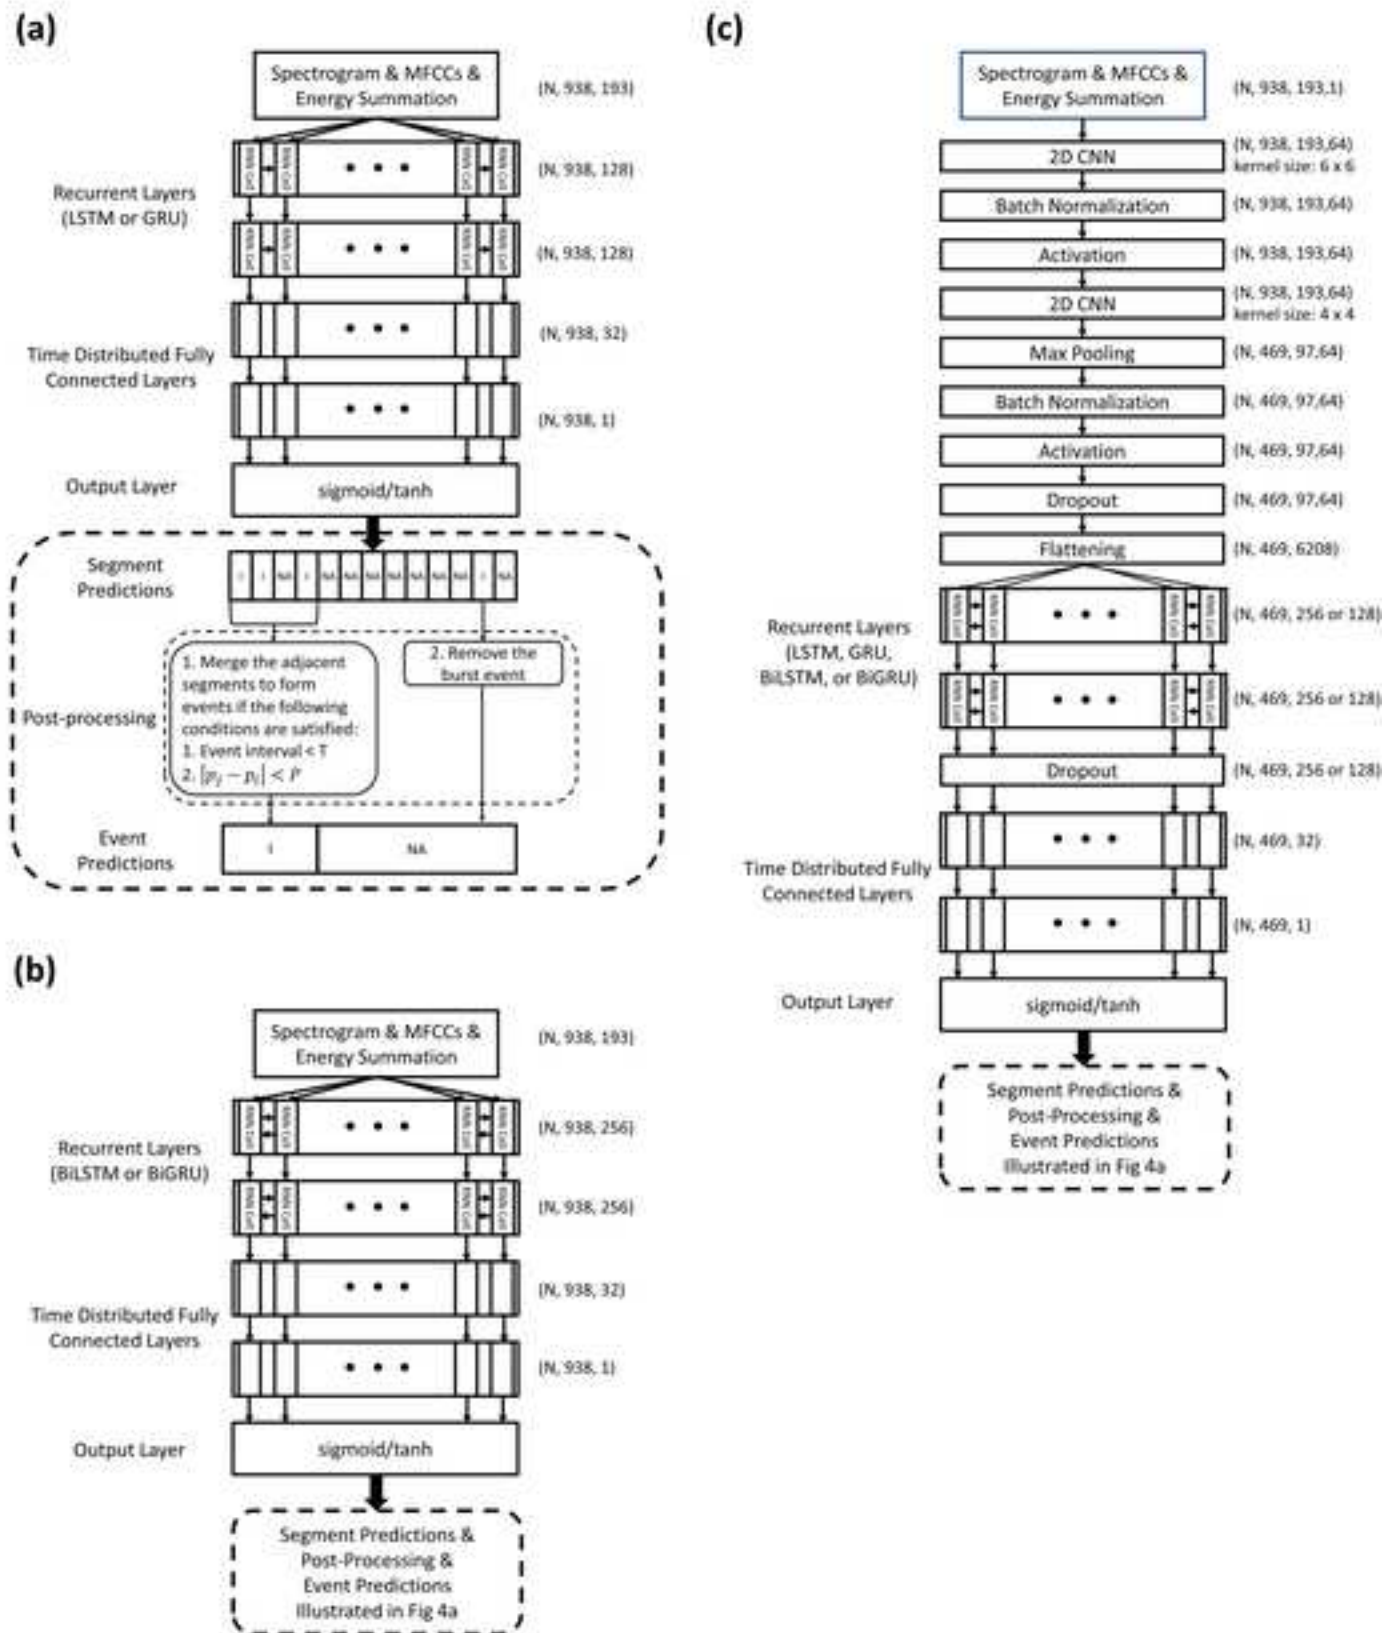

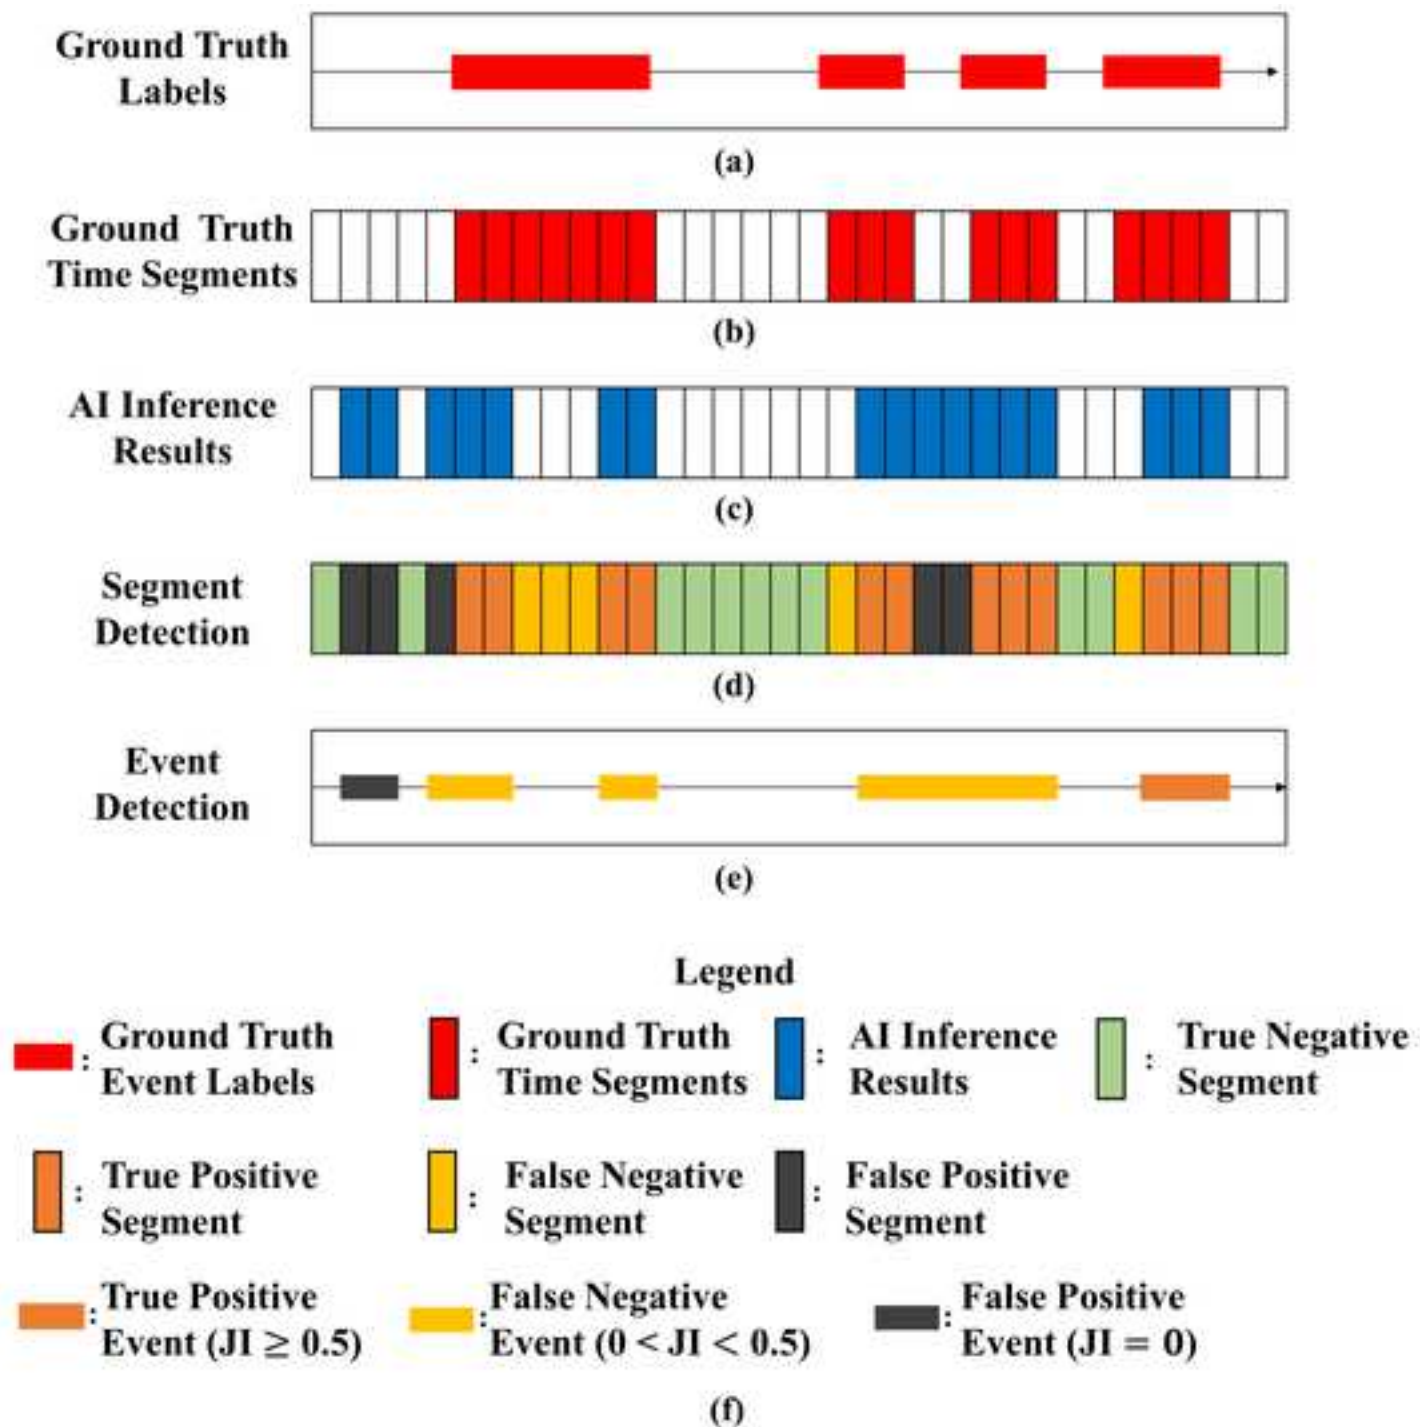

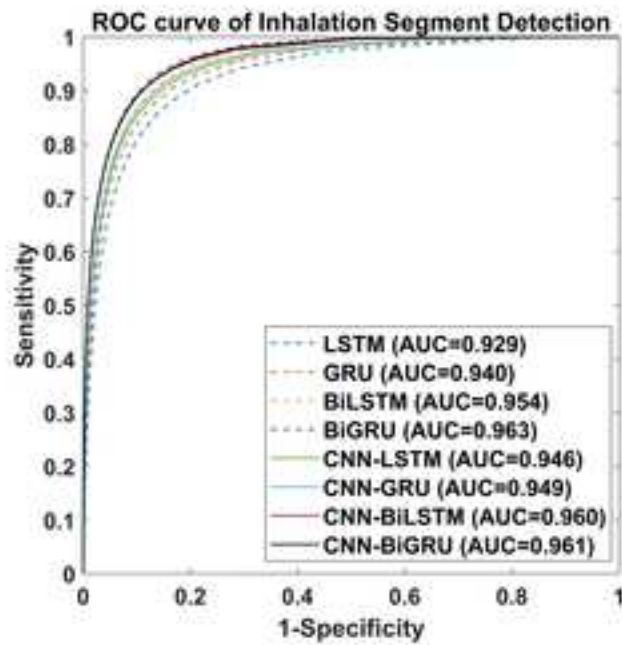

(a)

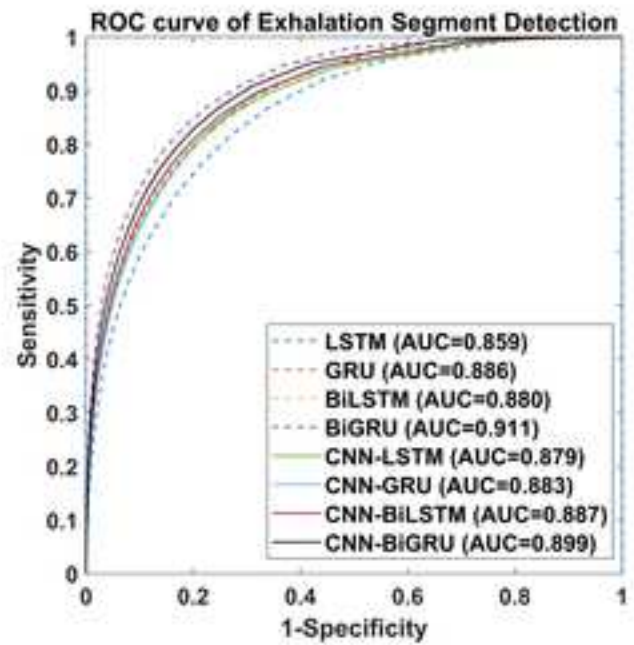

(b)

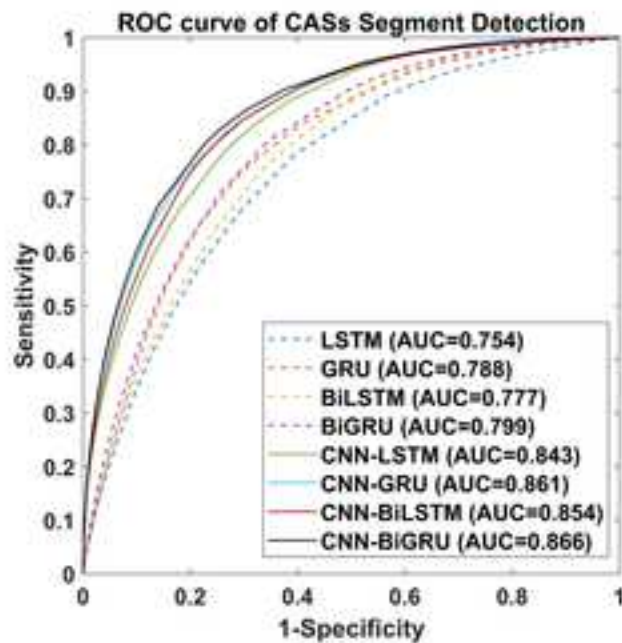

(c)

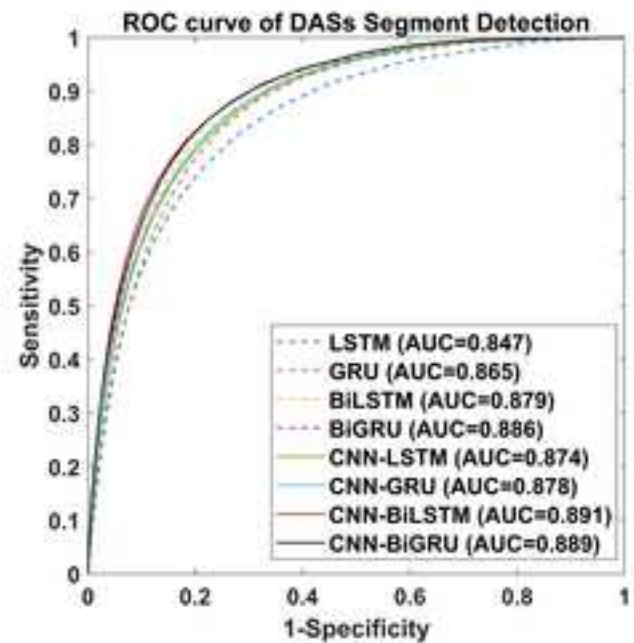

(d)



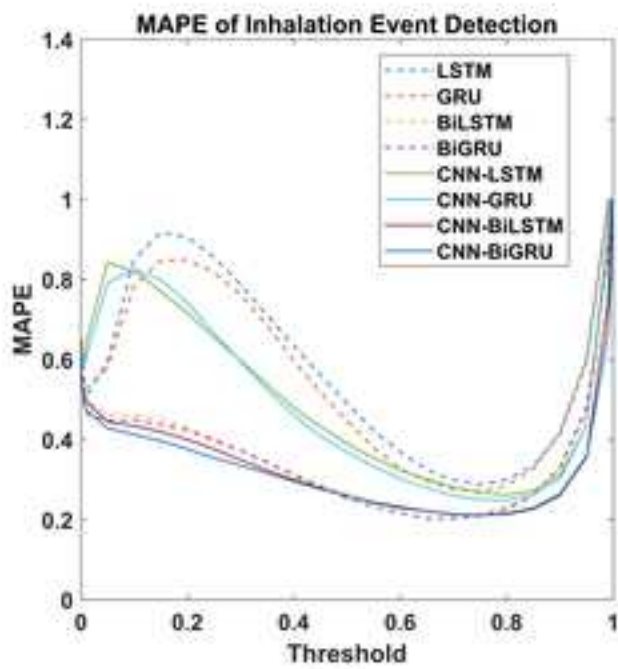

(a)

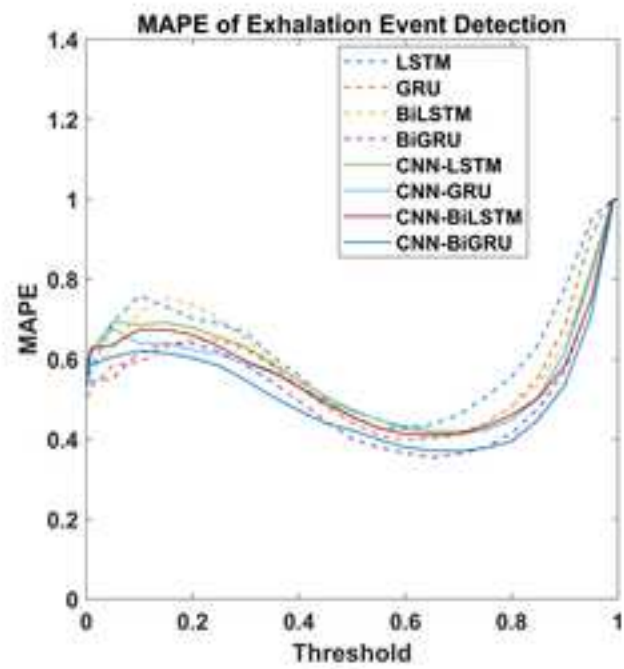

(b)

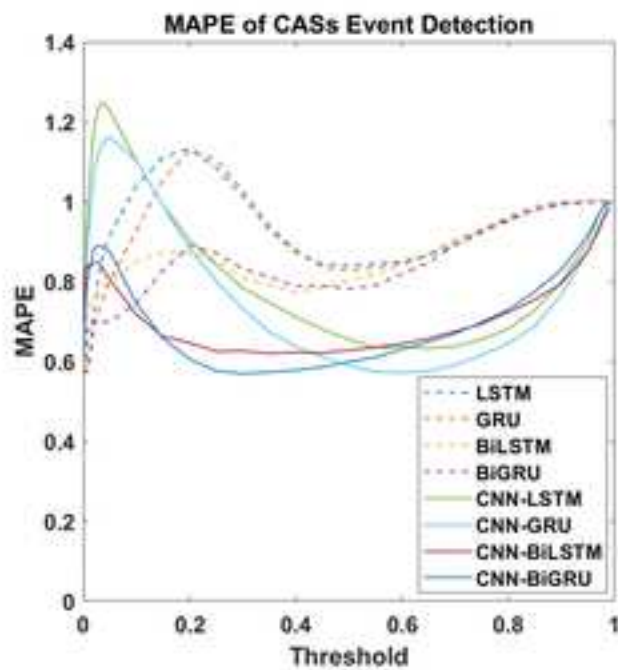

(c)

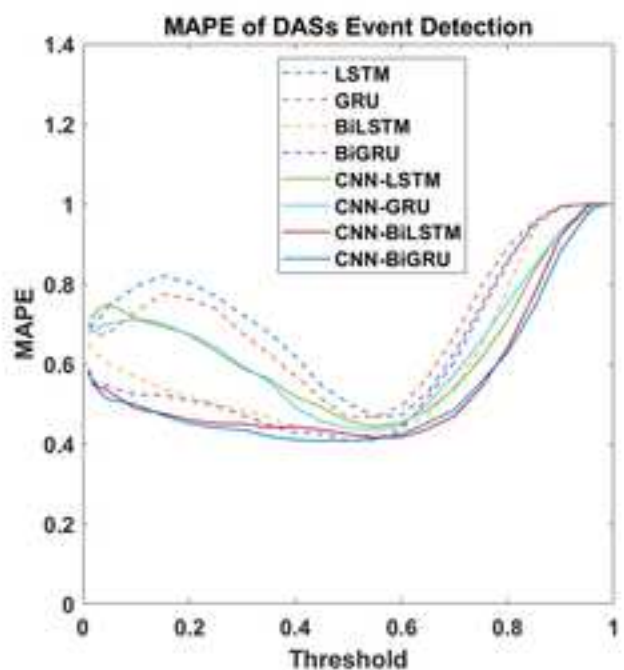

(d)

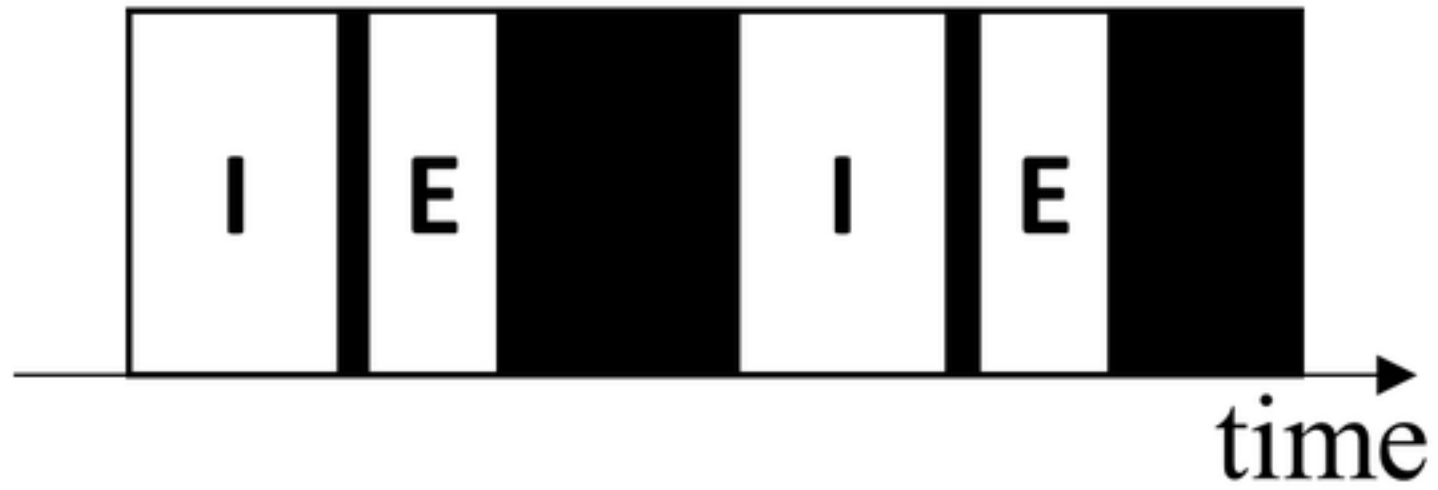

(a)

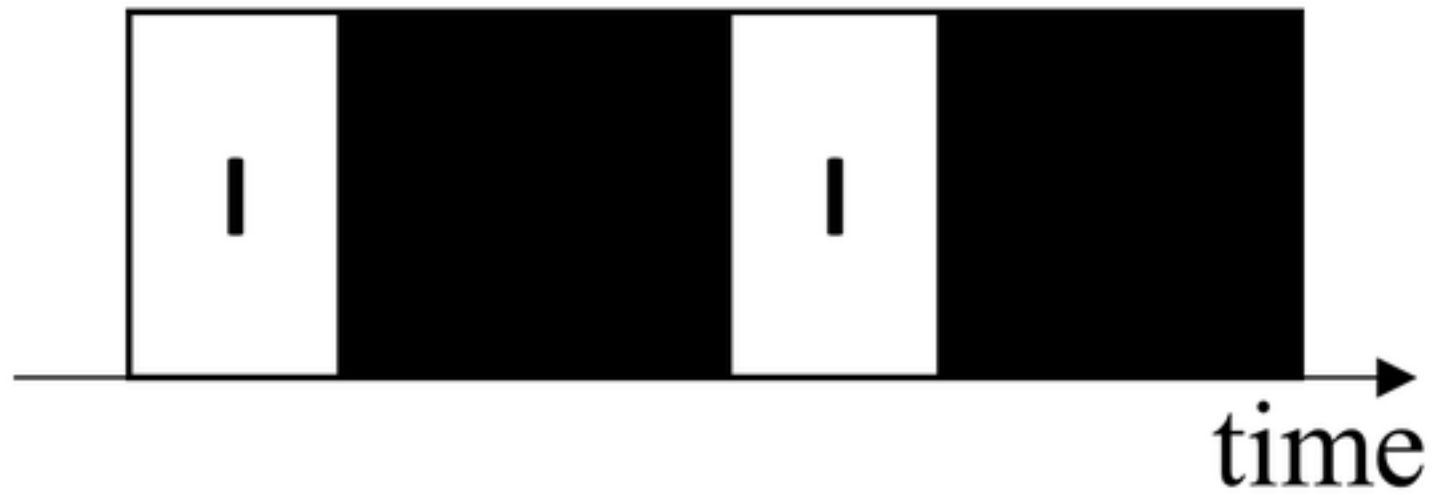

(b)

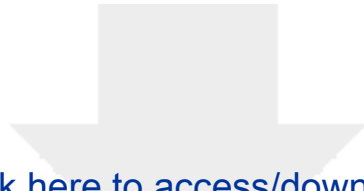

Click here to access/download  
**Supporting Information**  
Supporting information.docx

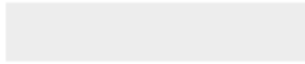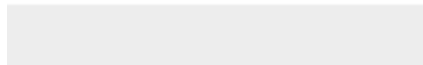

Supplement: pone.0254134.s006.pdf [file pone.0254134.s006.pdf]
